# Supplementary material for: Validation of a questionnaire measuring preschool children's reactions to and coping with noise in a repeated measurement design
Source: PubMed Central journal article supplement — BMJ Open. 2013 May 16;3(5):e002408. doi: 10.1136/bmjopen-2012-002408 (PMC3657644; doi:10.1136/bmjopen-2012-002408), 2013-05-16
Supplement: bmjopen-2012-002408.draft_revisions.pdf [file bmjopen-2012-002408.draft_revisions.pdf]

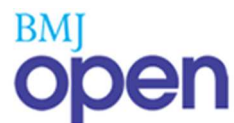

**Validation of a questionnaire measuring preschool children's reactions to and coping with noise in a repeated measurement design.**

|                                 |                                                                                                                                                                                                                                                                                                       |
|---------------------------------|-------------------------------------------------------------------------------------------------------------------------------------------------------------------------------------------------------------------------------------------------------------------------------------------------------|
| Journal:                        | <i>BMJ Open</i>                                                                                                                                                                                                                                                                                       |
| Manuscript ID:                  | bmjopen-2012-002408                                                                                                                                                                                                                                                                                   |
| Article Type:                   | Research                                                                                                                                                                                                                                                                                              |
| Date Submitted by the Author:   | 28-Dec-2012                                                                                                                                                                                                                                                                                           |
| Complete List of Authors:       | Persson Waye, Kerstin; Sahlgrenska academy, Gothenburg University, Department of Occupational and Environmental Medicine van Kamp, Irene; National Institute for Public Health and the Environment, Centre for Environmental Health Research Dellve, Lotta; Royal Institute of Technology, Ergonomics |
| <b>Primary Subject Heading</b>: | Occupational and environmental medicine                                                                                                                                                                                                                                                               |
| Secondary Subject Heading:      | Public health                                                                                                                                                                                                                                                                                         |
| Keywords:                       | EPIDEMIOLOGY, Community child health < PAEDIATRICS, PUBLIC HEALTH                                                                                                                                                                                                                                     |
|                                 |                                                                                                                                                                                                                                                                                                       |

SCHOLARONE™  
Manuscripts

## Summary

### *Study Focus:*

- ✓ Only a few studies have been performed on how noise affects preschool children.
- ✓ A prerequisite to do so is a method to measure perception, emotional and bodily reaction and coping with noise in the preschool situation.
- ✓ This study explored the reliability and validity of such an instrument based on data derived from a before after intervention study which was carried out at seven preschools in Sweden.

### *Key Messages:*

- ✓ The results show that preschool children can indeed make a clear distinction between perception of and reaction to different types of noise and bodily reactions.
- ✓ Visual representation of emotional reactions and the location of bodily reactions is a good and reliable way to measure reactions in young children.
- ✓ More work on larger samples will need to be done to further develop a standard instrument to be used in preschool aged children.

### *Strength and weaknesses*

- ✓ The strength of this study lies in the fact that the questions posed to the children were based on focus group discussion and worded in their own “language”.
- ✓ A major limitation is the relatively small sample size.

## INTRODUCTION

### Background

Earlier studies show that the sound environment at preschools may be a serious occupational and public health problem. Voss<sup>1</sup> measured eight hour equivalent noise exposure levels of 80 dB  $L_{Aeq}$  in daycare centers in Denmark. Maxwell and Evans<sup>2</sup> report four hour  $L_{Aeq}$  levels of 76 and peak levels of 96 dBC in preschools in the USA.

Dominant noise sources in preschools are sounds from children's activities indoors. In contrast to elementary schools, the sound environment in preschools is highly intermittent, uncontrollable and characterized by peak levels of high spectrum frequency, originating from voices and children's activities. Acoustical improvements in preschools and schools are most often made by fitting walls and ceiling with sound absorption panels. The calculated direct effects are a reduction of the reverberation time -the time it takes for a sound to decay 60 dB from its original intensity- and moderate reduction of sound level.<sup>3,4</sup> Few studies have evaluated the effects of reducing contact sounds such as rolling, sliding or impact sounds resulting from the interaction between surfaces of e.g. chairs and the floor or table wares and the table top..

Noisy preschool environments could lead to reduced understanding of speech and as a consequence impaired reading and writing abilities.<sup>2</sup> Exposures at a young age might also effect other aspects of later life functioning and the development of disease. Effects described in the literature indicating such a mechanism pertain to

1  
2  
3 hearing impairment<sup>5,6</sup> and increased levels of cortisol in children attending day care  
4  
5 centers.<sup>7,8,9</sup> Studies in older children have confirmed effects on reading  
6  
7 comprehension and memory<sup>10</sup>, performance<sup>11</sup>, coping, wellbeing and stress<sup>12,13</sup>, and  
8  
9 behavior and mental health.<sup>14</sup>  
10

11 Reactions to and coping with environmental noise have been studied  
12  
13 extensively in the past 30-40 years for adults.<sup>15</sup> Several recent studies also addressed  
14  
15 annoyance and coping in school children,<sup>16,17,12,18,19,20,11</sup> while only a handful of  
16  
17 studies addressed this issue in younger (preschool) children.<sup>2,21,22,23</sup> In comparison  
18  
19 with adults, children in general and preschool children in specific may be particularly  
20  
21 susceptible to the effects of noise because they have less capacity to anticipate,  
22  
23 understand and cope with stressors<sup>19</sup> and because they are in a crucial and sensitive  
24  
25 phase of their development.<sup>5,10</sup>  
26  
27  
28

29 Instruments to investigate young children's reactions to noise are not  
30  
31 available. In order to fill this gap a qualitative study was performed in 2006 among 36  
32  
33 preschool children in Mölndal (Sweden), aged 4-6 years<sup>24</sup> using the constructivist-  
34  
35 grounded theory as qualitative approach.<sup>25</sup> The children were asked about their  
36  
37 perception of sound in the preschool situation, their understanding of the source and  
38  
39 their perceived reactions at emotional and bodily level. Also, the degree of familiarity  
40  
41 and comprehensibility of the sounds, manageability/control as well as disturbance and  
42  
43 distress by the sounds were addressed. Finally, several coping strategies came  
44  
45 forward, subdivided in avoidance (getting away, covering ears etc) and problem-  
46  
47 oriented coping (complain to teacher). The method employed was in broad lines  
48  
49 comparable to that used by Haines et al.<sup>11</sup> in children aged 10-13. She concluded that  
50  
51 noise annoyance in children pertains to the same construct as in adults, and this was  
52  
53 later confirmed by others.<sup>11,16,15</sup> It is uncertain whether younger children are also  
54  
55  
56  
57  
58  
59  
60

1  
2  
3 able to make such distinctions and thus show a comparable pattern to older children  
4  
5 and adults, nor whether they are capable to answer questions during a structured  
6  
7 interview regarding their sound environment and the way they emotionally and  
8  
9 physically are affected by it in a consistent way.  
10

### 11 **Objectives**

12  
13 This paper explores and describes the reliability and validity of the key questions of a  
14  
15 standardized interview protocol- the Inventory of Noise and Children's Health  
16  
17 (INCH) -developed on the base of focus group interviews among 4-6 year old  
18  
19 preschool children. The questions pertain to preschool children's perception of noise  
20  
21 when at school, their bodily and emotional reaction to it, non-specific (stress related)  
22  
23 symptoms and their coping strategies used to diminish detrimental effects of the noise.  
24  
25 Aspects related to perceived control and behavioral reactions were left out of the  
26  
27 interview, since it was felt that observational methods to measure these aspects would  
28  
29 be more suitable to apply in this age group. Bodily reactions to noise in general as  
30  
31 well as noise specific reactions were used to examine the external validity of the  
32  
33 children's responses.  
34  
35  
36  
37  
38  
39

## 40 **MATERIALS AND METHODS**

### 41 **Selection and recruitment**

42  
43 In the period between October 2006 to October 2009 children aged 4-5 and their  
44  
45 parents were recruited from seven preschools where interventions were undertaken  
46  
47 with the purpose to improve the acoustical qualities in the preschools in Mölndal,  
48  
49 Sweden. In total, 63 children and 59 parents filled out the questionnaire before and  
50  
51 after the intervention. A control group of twenty three parents from three preschools  
52  
53 where no interventions were undertaken was also included in the study. Parental data  
54  
55  
56  
57  
58  
59  
60

1  
2  
3 will be reported elsewhere. Due to external circumstances no children were selected  
4  
5 for the control group from preschools where no intervention took place. The response  
6  
7 rates ranged from 80% in the parents to 98% in the children. Of the children two fell  
8  
9 outside the age range of 4-5 years and were excluded from further analysis, resulting  
10  
11 in a study population of 61 children.  
12

### 13 14 **Procedure**

15  
16 One month before and three months after the intervention the children were  
17  
18 interviewed. In order to diminish the risk of inter-rater variance as much as possible  
19  
20 the interviews were performed by two trained persons. The children were asked  
21  
22 questions in a structured way and presented with visual representations of scales on  
23  
24 show cards. When the child was not able to answer the question they were not  
25  
26 prompted to do so. For the core set of questions see Appendix 1. For information  
27  
28 about the full protocol please contact the first author.  
29  
30  
31  
32  
33

### 34 **Noise exposure assessment and interventions**

35  
36 Acoustic interventions included changes of floor mats, felt cushions under chairs and  
37  
38 sound absorbing tiles on ceilings and walls. Table tops had been changed to  
39  
40 acoustically soft material before the intervention. The expected effect of the  
41  
42 absorbents was a moderate reduction of the sound level in the range of 3 dBA, while  
43  
44 the change of table tops, felt cushions and change of floor maths were hypothesised to  
45  
46 mainly lead to less contact sounds from e.g. plates and glasses being placed on the  
47  
48 table or chairs pulled over the floor. These types of sounds would normally not be of  
49  
50 large importance for the overall sound level in a preschool, but the high frequency  
51  
52 characteristics of such sounds could be perceived as highly unpleasant.  
53  
54  
55  
56  
57  
58  
59  
60

1  
2  
3 Noise was measured one month before the interventions and three months after using  
4 stationary measurements and personal dosimeters worn by personnel and children in  
5 seven preschools.<sup>26,27</sup> Similar measurements were also undertaken in the three  
6 control preschools. Stationary measurements during activity in the various rooms  
7 showed a significant lower equivalent A-weighted level after the intervention as  
8 compared to before. For the playroom an average reduction was measured from 69 to  
9 66 dB<sub>LAeq</sub>, giving a difference of 2.9 dB (95%CI: 1.3-4.5). For the eating room an  
10 average reduction was measured from 69 to 68 dB<sub>LAeq</sub>, giving a difference of 1.2 dB  
11 (95%CI: 0.6-1.8). In the play halls the intervention did not alter the equivalent sound  
12 levels significantly from 69 to 66 (a difference of 3.8 dB, 95%CI: -0.8-7.6).

13  
14 Significantly lower maximum levels of 4.6dB<sub>AFmax</sub> (95%CI: 0.7-8.4) were found after  
15 the intervention in the play-halls and up to 2.0 dB<sub>AFmax</sub> in the playroom (95%CI 0.8-  
16 3.3). The sound levels in the control preschools did not change during the same time  
17 period, being on average 67-68 dB<sub>LAeq</sub> and 82-83 dB<sub>AFmax</sub> for the various rooms and  
18 for both measurement occasions.

19  
20 Children's dosimeters showed that personal average exposures were higher compared  
21 to stationary measurements and in the range of 83-85 dB<sub>LAeq</sub> and 117-118 dB<sub>AFmax</sub>,  
22 both at the intervention preschools and the control schools and before and after the  
23 intervention, hence the intervention did not affect personal levels in a measurable  
24 way.

### 25 26 27 **Noise perception**

28  
29 Noise perception was measured by means of standard questions. Children were asked  
30 how frequently they heard noise from three relevant noise sources in the preschool  
31  
32  
33  
34  
35  
36  
37  
38  
39  
40  
41  
42  
43  
44  
45  
46  
47  
48  
49  
50  
51  
52  
53  
54  
55  
56  
57  
58  
59  
60

1  
2  
3 situation: yelling and angry children, strong and loud sounds and scraping and  
4  
5 screeching sounds. Answers were indicated on a five -point Likert scale (ranging  
6  
7 from 'almost never to very often') presented as 5 circles increasing in size and  
8  
9 including 1 to 5 dots.  
10

11 The percentage of children who indicated that they never heard the sound was 17%  
12  
13 and 19% for the yelling sounds, 22% and 22% for loud sounds and 35% and 52 % for  
14  
15 the scraping and screeching sounds in the before and after condition respectively.  
16  
17

### 18 **Reaction to noise**

19  
20 Aspects of reaction were measured using the following wording: '*How do you*  
21  
22 *feel when\* you hear the [sounds of angry, yelling children][load and strong sounds]*  
23  
24 *scraping and screeching sounds]*. Answers were indicated on a bipolar visual  
25  
26 scale representing drawn figures with different facial and bodily expressions ranging  
27  
28 from glad/safe to sad/afraid and from kind/friendly to angry/irritated respectively.  
29  
30

31 The reaction was recoded to neutral position (code 3) for those children who indicated  
32  
33 on the previous question on perception, that they did not hear the sound. Figure 1 Here  
34  
35  
36  
37

### 38 **Coping strategies**

39  
40 For noise experienced at preschool, coping strategies were investigated by asking the  
41  
42 children what they did when there was a lot of noise and if they coped, how often that  
43  
44 was. The phrasing was as follows: '*When there is a lot of noise what do you do*' [*go*  
45  
46 *away*], [*put your hands over your ears*][*tell your teacher*] [*raise your voice*]and if so  
47  
48 *how often [almost never to all the time]*. Again visual representations were used.  
49  
50  
51

### 52 **Bodily reactions to noise and symptoms**



1  
2  
3 In order to measure bodily reactions to the three different sounds, the children were  
4  
5 asked to indicate per sound source whether they could feel the sounds in their body  
6  
7 and if so where they felt it (Figure 2) (*'when you hear [yelling and screams], [strong*  
8  
9 *and loud sounds],[ scraping and screeching sounds] can you feel it inside you or in*  
10  
11 *your body and if so please point out in the figure where you feel it'*). The answers  
12  
13 were recoded into location [*head*] [*neck*] [*arms*] [*heart*] [*belly*] [*legs*] [*feet*] as well  
14  
15 as in number of locations (none versus 1 or more).  
16  
17

18  
19 Figure 2 Here

20  
21 Nonspecific symptoms were inventoried by asking the children what  
22  
23 symptoms they had experienced in the past few days at preschool: headache, tummy  
24  
25 ache and hoarse voice. Finally a question was asked about general wellbeing, making  
26  
27 use of a similar figures used for reaction to noise [*'in the last days at preschool' have*  
28  
29 *you felt like any of these children in this picture*] which was recoded into a 1 to 5  
30  
31 scale.  
32  
33  
34  
35  
36  
37  
38  
39  
40  
41  
42  
43  
44  
45  
46  
47  
48  
49  
50  
51  
52  
53  
54  
55  
56  
57  
58  
59  
60

### Data analysis

In order to test the convergent and divergent validity of the different indices, as a first step, confirmative factor analysis (CFA) was carried out using SAS for Windows (version 9.3) on the reaction and coping questions and perceived health questions. Bodily sensation and health symptoms were included, in order to determine whether children could distinguish between emotional and bodily responses and nonspecific symptoms/ health complaints. Also the items on the questions regarding coping strategies were included in the analysis. A high correlation was expected between reactions (both bodily and emotional) to different noise sources, between symptoms and the different coping strategies. CFA is a special form of factor analysis which is used to test whether measures of a construct are consistent with a researcher's understanding of the nature of that construct (or factor) and therefore suitable for our purpose. The degree of consistency is expressed by several statistical quantities determining the adequacy of model fit to the data, including the standardized root mean square residual (SRMSR) and the adjusted goodness of fit (AGFI). Acceptable model fit is indicated by a SRMSR value of 0.08 or less<sup>28</sup> and a AGFI value of 0.95 or more.<sup>29</sup> The contribution of each item to a factor is expressed in factor loadings. Due to small sample size and departure from normality, diagonally weighted least squares were used to estimate the parameters of the factor model. In order to test the internal consistency of the components, Cronbach's alphas were calculated on the grouped items. Indices were composed by simply summing the separate items. These indices were further tested on their concurrent validity by comparing groups with one or more symptoms due to the different noise sources to a group who reported no symptoms. This was performed for the before and after condition separate by means of a t-test assuming unequal variances. Additional

analyses were performed on some relevant single items, which were excluded from CFA using nonparametric methods such as Spearman and Mann-Whitney.

## RESULTS

Table 1 shows the general characteristics of the children included in the analysis. The 61/59 children respectively included in the before – after study are reasonably well distributed over gender and age groups. The number of interviewed children per preschool ranged from 4 to 15. The prevalence of noise perception is presented per noise source as percentage of children scoring in the highest two categories, while reaction, total coping strategies and symptoms are presented as the percentage of children scoring in the highest two categories per sum-score.

Table 1: General characteristics of the children (Before and After intervention).

| Characteristic                               | Before | After |
|----------------------------------------------|--------|-------|
| <b>Number of Respondents (n)</b>             | 61     | 59    |
| <b>Gender</b>                                |        |       |
| girls                                        | 48%    | 49%   |
| boys                                         | 52%    | 51%   |
| <b>Age</b>                                   |        |       |
| 4 years                                      | 52%    | 32%   |
| 5 years                                      | 48%    | 49%   |
| 6 years                                      | -      | 8%    |
| <b>Perception noise source ( score 4, 5)</b> |        |       |
| Angry and screams: Source 1                  | 67%    | 58%   |
| Loud and strong: Source 2                    | 57%    | 51%   |
| Scraping and Screeching: Source 3            | 35%    | 18%   |
| <b>Angry reaction (&gt;11)</b>               | 13.1%  | 4.8%  |
| <b>Prevalence Symptoms (&gt;11)</b>          | 6.8%   | 3.8%  |
| <b>Coping(&gt;15)</b>                        | 13.0%  | 16.3% |
| <b>Location bodily reaction</b>              |        |       |
| At least 1 location                          | 70%    | 80%   |
| Source 1                                     | 54%    | 49%   |
| Source 2                                     | 54%    | 56%   |
| Source 3                                     | 51%    | 49%   |

### Reaction and coping in children: construct validity

Confirmatory factor analyses (CFA) with categorical indicators were carried out to verify the a-priori structure pertaining to perception, emotional reaction, symptoms and coping strategies in the before and after condition. The perception scales [*How often do you hear screaming and angry children, strong and loud sounds and scraping and screeching sounds*] as well as the sad reaction scales showed to be too unstable to consider for further analysis. Likewise, the items pertaining to noise perception per source and unwell-being, were too unstable or loaded on many factors and therefore were treated as single items in further analysis (see Table 2). A three factor model was fitted to the remaining ten items pertaining to angry reactions, symptoms and coping. The model fit was good with a SRMSR of .08 and an AGFI of .97 in the before condition, but weaker in the after condition with a SRMSR of .12 and an AGFI of .91. For the before condition the loading are in the ranges .58 to .77, .41 to .78 and .51 to .71 for the three factors respectively. It was decided to take the before analysis as a point of departure and to test the reliability of the scales based on the measurements in the before and after condition.

Table 2: Factor Loadings, Goodness of Fit, internal consistency and interrelations

|                                              | Components/Before |      |      | Components/After |      |      |      |
|----------------------------------------------|-------------------|------|------|------------------|------|------|------|
|                                              | I                 | II   | III  | I                | II   | III  |      |
| Source1_angry                                | .63               |      |      | .33              |      |      |      |
| Source2_angry                                | .77               |      |      | .55              |      |      |      |
| Source3_angry                                | .58               |      |      | .73              |      |      |      |
| go away                                      |                   | .78  |      |                  | .32  |      |      |
| cover ears                                   |                   | .52  |      |                  | .46  |      |      |
| tell teacher                                 |                   | .41  |      |                  | .62  |      |      |
| raise voice                                  |                   | .57  |      |                  | .72  |      |      |
| headache                                     |                   |      | .71  |                  |      | .53  |      |
| tummy ache                                   |                   |      | .67  |                  |      | .18  |      |
| hoarse voice                                 |                   |      | .51  |                  |      | .61  |      |
| Cronbach's alpha                             | .63               | .65  | .67  | .56              | .54  | .52  |      |
| SRMSR                                        | .08               |      |      | .12              |      |      |      |
| AGFI                                         | .97               |      |      | .91              |      |      |      |
| <b>BEFORE</b>                                | a                 | b    | c    | d                | e    | f    | g    |
| a. Perception yelling children               | 1                 | .48* | .19  | .09              | .11  | .23* | -.12 |
| b. Perception loud and strong sounds         |                   | 1    | .30* | .24*             | .25* | .33* | .00  |
| c. Perception scraping and screeching sounds |                   |      | 1    | .23*             | .37* | .25* | .23* |
| d. Angry reaction                            |                   |      |      | 1                | .33* | .15  | .22* |
| e. Symptoms                                  |                   |      |      |                  | 1    | .34* | .56* |
| f. Coping strategies                         |                   |      |      |                  |      | 1    | -.10 |
| f. Unwell-being                              |                   |      |      |                  |      |      | 1    |

\* Significant at .05 level/missing values pairwise deletion

### Reliability in terms of internal consistency

Three groups of variables pertaining to Angry Reaction, Coping and Symptoms were tested on their internal consistency expressed in alpha for the two measurements (Table 2 row 11). The analysis yielded homogeneous scales with comparable alpha's over the measurements ranging from .56 to .75. Subsequently, three indices were composed by simply summing the scores on the separate items within each factor and distributions were tested on normality. Deviations of normality were slight and most pronounced in the symptom scales.

Correlation analyses between these indices and items related to perception of noise and unwell-being were studied (Table 2) and showed moderate to weak associations between perception and outcomes, but mostly in line with our expectations.

Perception of scraping and screeching sounds was most strongly associated with angry reactions, coping, symptoms as well as unwell-being followed by perceived loud sounds. Coping strategies were associated most strongly with symptoms and the highest association was found between symptoms and unwell-being. Since items referring to sad reactions to the different sounds did not form one factor and the bipolar items do not allow for correlational analysis, separate analysis was performed after dichotomizing the scores on sad reaction items. Mann-Whitney analysis showed that sadness due to loud noises was associated with symptoms ( $Z$ -value=2.3/ $p$ =.021) and sad reaction due to scraping/screeching sounds with symptoms ( $Z$ -value=3.4/ $p$ =.001) and coping strategies ( $Z$ -value=2.7/ $p$ =.008), while sadness due to yelling sounds was found not to be associated with any of the indices on angry reaction, symptoms or coping.

### Concurrent validity

As a last step in the psychometric evaluation, the associations between bodily reactions to noise and the three indices and the single item unwell-being were analyzed to explore the concurrent validity. This refers to the accuracy of the relevant test scores to estimate an individual state on a criterion, in this case bodily reaction (general and noise source specific).

The rationale behind this analysis is that angry reaction, amount of coping strategies (number and frequency) and symptoms as well as unwell-being are expected to be associated with bodily reactions. The associations between bodily reactions to noise with these relevant test-scores were studied by means of t-test. Hereby dichotomous groups were formed based on respectively any bodily reaction, and bodily reactions per noise source versus none. Distributions were checked per group and angry reaction was dropped from the analysis because the majority of data points in the group with no bodily reaction contained only children who had indicated they did not hear the sound. Subsequently, the mean scores on the remaining indices and the unwell-being item were compared between groups.

Table 3 presents the results

Table 3: T-test on bodily reaction and children's coping, symptoms and unwell-being

|                          | Any source         | Yelling sounds     | Loud sounds        | Scraping and screeching sounds |
|--------------------------|--------------------|--------------------|--------------------|--------------------------------|
| Symptom before           | <b>-4.67/0.000</b> | <b>-2.18/0.033</b> | <b>-2.34/0.023</b> | <b>-2.69/0.009</b>             |
| Coping strategies before | <b>-2.62/0.012</b> | <b>-2.58/0.012</b> | -1.53/0.131        | <b>-2.04/0.045</b>             |
| Unwell-being before      | -1.97/0.056        | <b>-2.34/0.023</b> | -1.05/0.297        | -1.50/0.140                    |
| Symptom after            | <b>-3.20/0.003</b> | -1.40/0.167        | -1.06/0.294        | -0.30/0.766                    |
| Coping strategies after  | -0.14/0.894        | -0.66/0.510        | -1.99/0.052        | -0.87/0.385                    |
| Unwell-being after       | <b>-2.77/0.010</b> | -0.79/0.433        | -1.91/0.062        | -1.36/0.178                    |

Observed t-statistic/p-value with significant results on level 0.05 marked as bold

T-test yielded significant differences in means on symptoms before for groups based on presence of any bodily reactions as well as presence of bodily reaction to the separate sources. The same pattern was found for coping with the exception of loud sounds. Unwell-being when at school in the before condition, measured with a single item, showed to be associated significantly with bodily reaction to loud sounds only, while any bodily reaction just failed significance. In the after condition this pattern was only partly confirmed for symptoms with any bodily reaction and unwell-being with any bodily reaction. Since t-test assumes normal distribution, in addition non parametric tests were applied. Further analysis showed that each hypothesis with p-value <0.05 for the t-test had Mann-Whitney p-values not exceeding 0.08.

## DISCUSSION

The results of the psychometric evaluation show that preschool children are able to make a distinction between reactions to noises and emotional and bodily reactions as measured by means of visual representations of reactions and representation of the location of bodily reactions. As in adults<sup>30</sup>, the interrelations between angry reactions



1  
2  
3 to different sounds and noises were relatively high, while the relation between angry  
4  
5 reactions and symptom related aspects was lower: in other words reaction and  
6  
7 symptoms can be considered as separate dimensions. This is also consistent with the  
8  
9 findings among school children (9-11 years) in the RANCH study<sup>17</sup> and a survey  
10  
11 among 207 children (aged 13-14 years).<sup>31,33</sup> Furthermore, the results are in  
12  
13 agreement with the results of a RANCH sub-study<sup>32</sup> in which it was found that  
14  
15 children were capable to reliably index complex soundscapes and to provide  
16  
17 perceptual scales that were in striking agreement with the perceptual scales provided  
18  
19 by adults. We also found that angry reactions to noise could be distinguished from  
20  
21 coping strategies. Comparing the elements of the correlation matrix in the before  
22  
23 condition for perceptions of the different sound sources and its effects we conclude  
24  
25 that scraping and screeching sounds play a prominent role, with significant  
26  
27 associations for angry reaction, coping and symptoms. Whilst coping was  
28  
29 significantly associated with all sounds, angry and loud sounds were not associated  
30  
31 with angry reaction nor symptoms. Based on the pattern we hypothesize that there is a  
32  
33 pathway from perception of scraping and screeching sounds via angry reactions and  
34  
35 coping to symptoms and via symptoms to unwell-being.  
36  
37  
38  
39

40 An important finding is that children compared to adults seem to have a  
41  
42 tendency to describe reaction to noise in a somatic way: they literally feel the noise in  
43  
44 their body, especially in the head, heart and tummy, with a prevalence varying  
45  
46 between 15-20%.  
47  
48

49 Both the (angry) reaction and symptoms indices are significantly associated  
50  
51 with general unwell-being while at school and these responses tend to be sound  
52  
53 specific. Where loud and screaming sounds are only associated with coping, the  
54  
55 perception of scraping and screeching sounds is significantly associated with angry  
56  
57  
58  
59  
60

1  
2  
3 reactions, coping as well as symptoms. This finding is important in view of future  
4  
5 interventions at preschools as scraping and screeching sounds mainly originate from  
6  
7 contact sounds between surfaces.  
8

9  
10 The four coping items included in the questionnaire pertain to active and  
11  
12 avoidant behavior, a distinction which is confirmed in studies among older children  
13  
14 and adults, but also came forward from the focus group discussions with children.<sup>24</sup>  
15  
16 Results of CFA analysis showed a high inter correlation between the different coping  
17  
18 strategies, with a slight tendency for a two sub-factors structure, pertaining to problem  
19  
20 oriented coping and avoidance. This has implications for the interpretation of the  
21  
22 coping index: it refers to the number and frequency of strategies employed rather than  
23  
24 more or less effective strategies to cope with environmental noise. Future work should  
25  
26 attempt to expand the number of items related to these different strategies which  
27  
28 young children employ to cope with classroom noise.  
29  
30

31  
32 A comparison between the before and after data shows a consistent pattern for  
33  
34 symptoms and coping, but is somewhat less clear for angry reactions. Explorative  
35  
36 comparison of children's symptom report and bodily reactions reveal a reasonable  
37  
38 consistent pattern and indicate satisfactory concurrent validity of most of the indices  
39  
40 in particular for the before situation. There is no explanation for much weaker  
41  
42 associations in the after situation, but a link with the intervention cannot be excluded.  
43  
44

45  
46 The strength of this study lies in the fact that the questions posed to the  
47  
48 children were based on focus group discussion and worded in their own "language".  
49  
50 A major limitation is the relatively small sample size. Future research on larger  
51  
52 groups of preschool children will be needed to further refine the questions in  
53  
54 particular the questions pertaining to well-being. Such an instrument will allow for  
55  
56  
57  
58  
59  
60

1  
2  
3 studying development in reaction over time as well as the evaluation of noise reducing  
4  
5 measurements in preschool in an unobtrusive and playful manner.  
6

7  
8 Previous studies suggest that children have fewer possibilities for controlling  
9  
10 noise or have a less developed coping repertoire than adults.<sup>19 24</sup> Development of  
11  
12 coping strategies would be an important target for future research in this group: noise  
13  
14 induced behaviors at a young age (e.g. learned helplessness) might affect other  
15  
16 aspects of later life functioning and the development of disease. Furthermore, this  
17  
18 study shows that emotional reaction (angry and sad) is not the only relevant indicator  
19  
20 of the effects of community noise in children, also bodily reactions, symptoms,  
21  
22 coping behavior and wellbeing show to be important.  
23  
24  
25  
26

## 27 **CONCLUSION**

28  
29 The main conclusion to be drawn from this study is that young children's angry  
30  
31 reaction and bodily reactions to and coping with noise can be reliably measured with a  
32  
33 structured interview, including visual representation questions. In accordance with  
34  
35 what was found in adults<sup>30</sup> and children aged 9-11<sup>17</sup> we found that also younger  
36  
37 children are able to distinguish between reaction/annoyance and symptoms and  
38  
39 coping. Compared to adults, younger children tend to describe their reactions to noise  
40  
41 in a somatic way. After further development of the instrument discussed in this paper  
42  
43 we foresee studies into young children's reactions to and coping with noise on a larger  
44  
45 scale.  
46  
47  
48  
49  
50  
51  
52  
53  
54  
55  
56  
57  
58  
59  
60

## REFERENCES

1. Voss P. Noise in children's day care centers. Akoustik Net, 2005, Denmark. [www.akustiknet.dk](http://www.akustiknet.dk)
2. Maxwell L.E., Evans G.W. The effects of noise on preschool children's prereading skills. *J. Environ. Psychol.* 2000, 20: 91-97.
3. Kawai, K. Effect of sound absorption on indoor sound environment of nursery school classrooms. Proceedings of 20th International Congress on Acoustics, ICA , 2010, Sydney, Australia.
4. Berg, F., Blair, J., & Benson, P. (Classroom acoustics: The problem, impact, and solution. *Language, Speech, and Hearing Services in Schools*, 1996, 27, 16-20.
5. WHO. Guidelines for community noise (Edited by: Berglund B, Lindvall T, Schwela DH, Goh KT). Geneva: World Health Organization, 2000, Guideline Document.
6. Passchier-Vermeer W. Noise and Health of Children. TNO report PG/VGZ/2000.042. Leiden: Netherlands Organization for Applied Scientific Research (TNO) 2000.
7. Dettling, A. C., Parker, S. W., Lane, S. K. et al. Quality of care and temperament determine whether cortisol levels rise over the day for children in full-day child care. *Psychoneuroendocrinology*, 2000, 25, 819-836.
8. Evans, Gary W. The Environment of Childhood Poverty. *American Psychologist*, 2004, (59), 77-92.
9. Blair, Clancy, Douglas Granger, Rachel Peters Razza (Cortisol Reactivity Is Positively Related to Executive Function in Preschool Children Attending Head Start. *Child Development*, 2005, 76, 3, pp 554-567.
10. Stansfeld SA, Berglund B, Clark C, et al. Aircraft and road traffic noise and children's cognition and health: a cross-national study. *Lancet*, 2005, 365: 1942-9.
11. Haines MM, Brentnall SL, Stansfeld SA, et al. Qualitative responses of children to environmental noise. *Noise & Health*, 2003, 5(19): 19-30.
12. Lercher, P, G W Evans, M Meis et al. Ambient neighbourhood noise and children's mental health *Occup Environ Med*; 2002, 59:380-386 doi:10.1136/oem.59.6.380
13. May et al., A. Edmond, E. Crawley Phenotypes of chronic fatigue syndrome in children and young people. *Arch Dis Child*, 2009, 95, 245-249.
14. Stansfeld SA. The effects of noise on health; new challenges and opportunities Euronoise Edinburgh, 2009 Plenary paper.
15. Clark C., Stansfeld S.A. The effect of transportation noise on health and cognitive development : a review of recent evidence. *Int J Comp Psychl.*, 2007, 20: 145-158.
16. Babisch, W., Schulz, C., Seiwert, M. et al. Noise annoyance as reported by 8-14 year old children. *Environment and Behavior*, 2012, 44 (1) 68-86.
17. Van Kempen EMM, Kamp I van, Stellato R. et al. Children's annoyance reactions to aircraft noise and road traffic noise: the RANCH-project. *JASA*, 2009, 125, 895-904.
18. Lercher, Peter, Gary W. Evans and Markus Meis Ambient Noise and Cognitive Processes among Primary Schoolchildren. *Environment and Behavior*, 2003, 35: 725.

19. Bistrup M.L. Prevention of adverse effects of noise on children. *Noise & Health*, 2003, 5 (19): 59-65.
20. Haines MM, Stansfeld SA, Job RFS. Et al. Chronic aircraft noise exposure, stress responses, mental health and cognitive performance in school children. *Psychol. Med.*, 2001a, 31: 265-77.
21. Regecová V, Kellerová E. Effects of urban noise pollution on blood pressure and heart rate in preschool children. *J Hypertens*. 1995, 13(4):405-12.
22. Belojevic G, Jakovljevic B, Vesna S et al. Urban road-traffic noise and blood pressure and heart rate in preschool children. *Environ Int.*, 2008, 34: 226-231.
23. Maxwell, L.E. Preschool and day care environments. In R. Lueder & V. Rice (Eds). *Child Ergonomics* (pp. 653-688). 2007, New York: Taylor and Francis..
24. Dellve, L, L. Samuelsson, K. Persson Waye Preschool children's experience and understanding of their soundscape. *Qualitative Research in Psychology* 2012, (ID: 586099 DOI:10.1080/14780887.2011.586099, in press).
25. Charmaz, K. *Constructing grounded theory: a practical guide through qualitative analysis*. 2006 Thousand Oaks: SAGE Publications.
26. Persson Waye K., O. Larsson, M. Hult Perception and measurement of preschool sound environment before and after acoustic improvements. *Proceedings Internoise*, 2009, Ottawa.
27. Persson Waye K., A. Agge, J. Hillström, F. Lindström Being in a preschool sound environment- annoyance and subjective symptoms among personnel and children. Perception and measurement of preschool sound environment before and after acoustic improvements. *Proceedings Internoise*, 2010, Lisbon.
28. Hu L. & Bentler P.M. Cutoff criteria for fit indexes in covariance structure analysis: Conventional criteria versus new alternatives. *Structural Equation Modeling*, 1999, 6(1), 1-55.
29. Shevlin M, Miles J. N. V. Effects of sample size, model specification and factor loadings on the GFI in confirmatory factor analysis. *Personality and Individual Differences*, 1998, 25 (1): 85-90.
30. Van Kamp Indicators of annoyance: a psychometric approach; the measurement of annoyance and interrelations between different measures. *Proceedings Internoise*, 2001, Den Haag.
31. Boman E, Enmarker I. Factors affecting pupils' noise annoyance in schools: the building and testing of models. *Environment and Behavior*, 2004, 36 (2): 207-28.
32. Gunnarsson A.G., Berglund B., Haines M., Nilsson M.E., Stansfeld S.A. Psychological restoration in noise in: Jong R.G. de, Houtgast T., Franssen, E.A.M., Hoffman, W.F.. *Proceedings of the 8th International Congress on Noise as a Public Health Problem*. Rotterdam, the Netherlands, 2003, pp 159-60.
33. Enmarker I. and Boman E. Noise annoyance responses of middle school pupils and teachers. *J Environ Psychol.*, 2004, 24: 527-36.

1  
2  
3  
4  
5  
6  
7  
8  
9  
10  
11  
12  
13  
14  
15  
16  
17  
18  
19  
20  
21  
22  
23  
24  
25  
26  
27  
28  
29  
30  
31  
32  
33  
34  
35  
36  
37  
38  
39  
40  
41  
42  
43  
44  
45  
46  
47  
48  
49  
50  
51  
52  
53  
54  
55  
56  
57  
58  
59  
60

Figure 1: Visual representation with point scale ranging from kind/friendly to angry/irritated

Figure 2: Visual representation of body location

For peer review only

1  
2  
3  
4  
5  
6  
7  
8  
9  
10  
11  
12  
13  
14  
15  
16  
17  
18  
19  
20  
21  
22  
23  
24  
25  
26  
27  
28  
29  
30  
31  
32  
33  
34  
35  
36  
37  
38  
39  
40  
41  
42  
43  
44  
45  
46  
47  
48  
49  
50  
51  
52  
53  
54  
55  
56  
57  
58  
59  
60

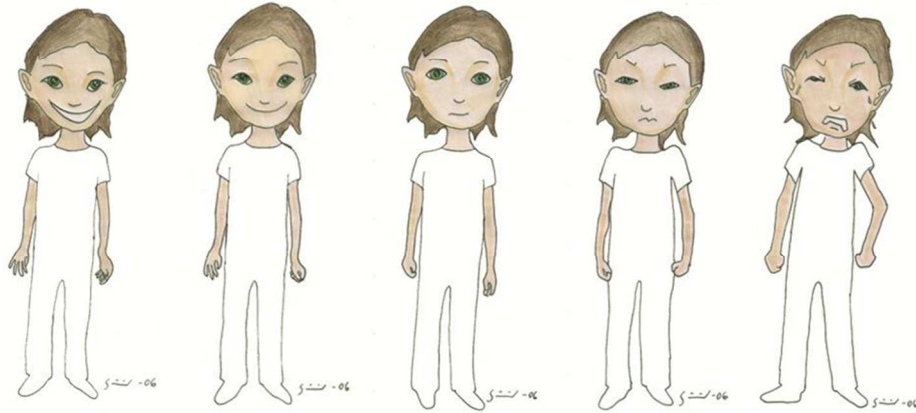

180x88mm (145 x 145 DPI)

er review only

1  
2  
3  
4  
5  
6  
7  
8  
9  
10  
11  
12  
13  
14  
15  
16  
17  
18  
19  
20  
21  
22  
23  
24  
25  
26  
27  
28  
29  
30  
31  
32  
33  
34  
35  
36  
37  
38  
39  
40  
41  
42  
43  
44  
45  
46  
47  
48  
49  
50  
51  
52  
53  
54  
55  
56  
57  
58  
59  
60

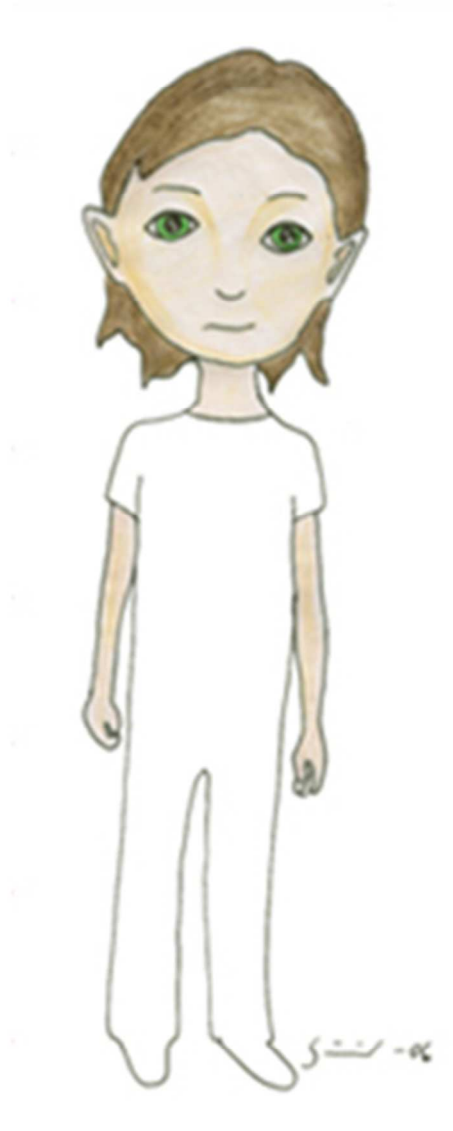

1= head

2= neck

3= heart

4= stomach

5= arm

6= leg

7= feet

87x102mm (150 x 150 DPI)



1  
2  
3  
4  
5  
6  
7  
8  
9  
10  
11  
12  
13  
14  
15  
16  
17  
18  
19  
20  
21  
22  
23  
24  
25  
26  
27  
28  
29  
30  
31  
32  
33  
34  
35  
36  
37  
38  
39  
40  
41  
42  
43  
44  
45  
46  
47  
48  
49  
50  
51  
52  
53  
54  
55  
56  
57  
58  
59  
60

Inventory of Noise and  
Children's Health  
**INCH**

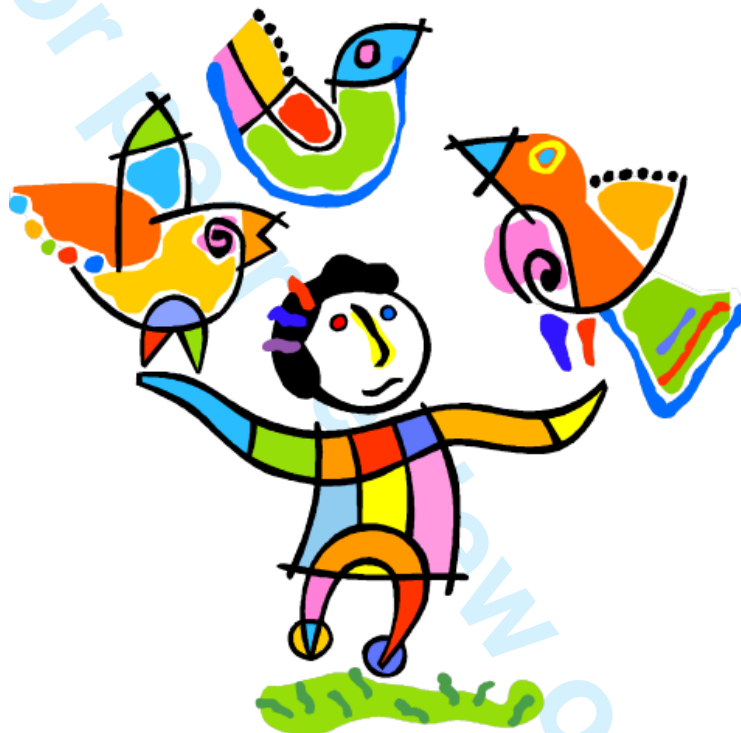

- 1  
2  
3  
4  
5  
6  
7  
8  
9  
10  
11  
12  
13  
14  
15  
16  
17  
18  
19  
20  
21  
22  
23  
24  
25  
26  
27  
28  
29  
30  
31  
32  
33  
34  
35  
36  
37  
38  
39  
40  
41  
42  
43  
44  
45  
46  
47  
48  
49  
50  
51  
52  
53  
54  
55  
56  
57  
58  
59  
60
10. How often do you hear other children at preschool being angry and yelling?
12. How often do you hear loud and strong sounds at preschool - like shouting, screaming or banging?
14. How often do you hear scraping and screeching sounds?

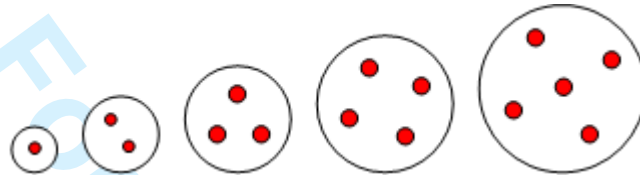

Almost never

Very often

Repeat for 10, 12, 14

- 11a. When you hear other children being angry and yelling, do you feel it inside you or in your body?
- 13a. When you hear loud, strong sounds, do you feel it inside you or in your body?
- 15a. When you hear scraping and screeching sounds, do you feel it inside you or in your body?

If No, go to Question 16.  If Yes, point out in the picture where you feel it.

Repeat for 11a, 13a, 15a

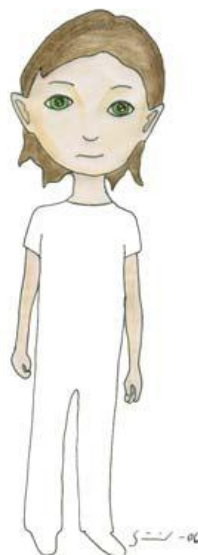

1  
2  
3  
4  
5  
6  
7  
8  
9  
10  
11  
12  
13  
14  
15  
16  
17  
18  
19  
20  
21  
22  
23  
24  
25  
26  
27  
28  
29  
30  
31  
32  
33  
34  
35  
36  
37  
38  
39  
40  
41  
42  
43  
44  
45  
46  
47  
48  
49  
50  
51  
52  
53  
54  
55  
56  
57  
58  
59  
60

11c. Sometimes when you hear children being angry and yelling, you might feel like one of the children in this picture.

13c. Sometimes when you hear loud, strong sounds, you might feel like one of the children in this picture.

15c. Sometimes when you hear scraping and screeching sounds, you might feel like one of the children in this picture.

Point to the child that looks most like how you feel when you hear these sounds.

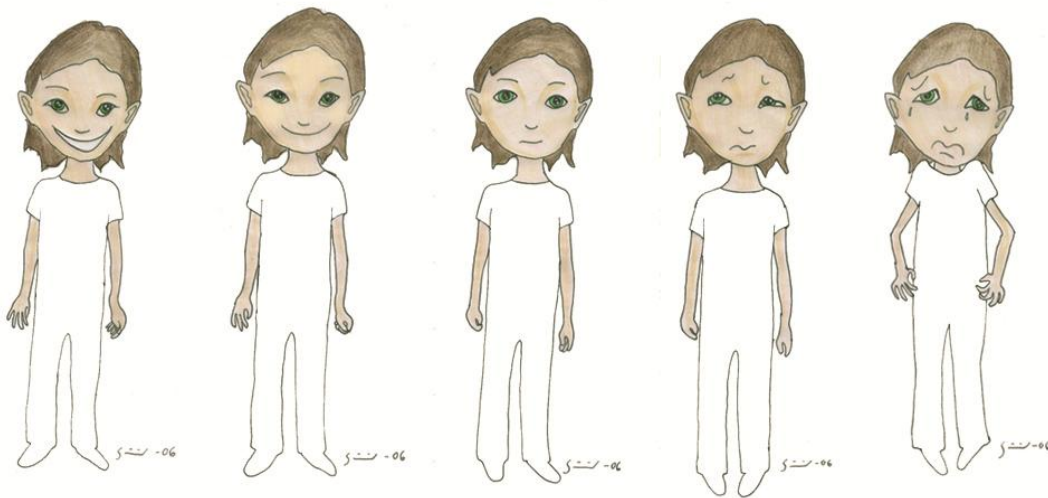

glad/safe

sad/afraid

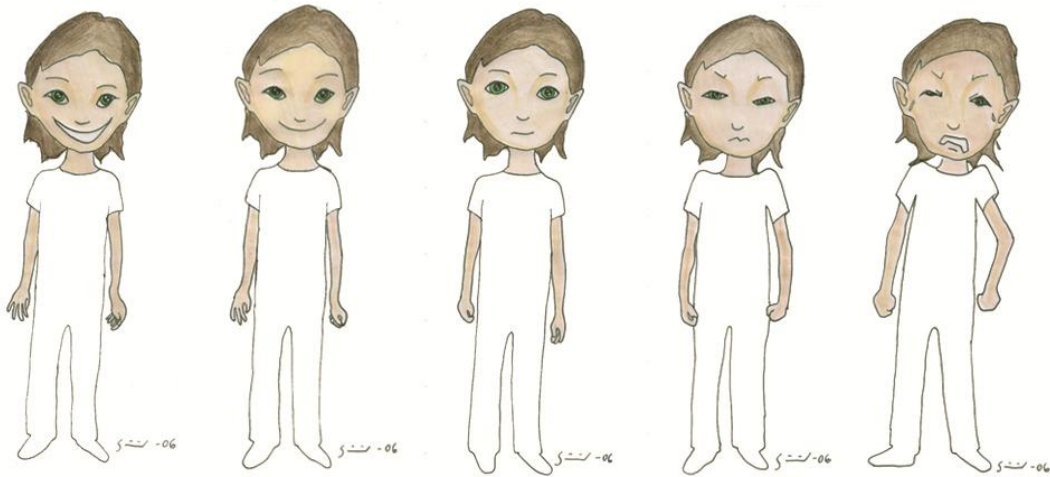

kind/friendly

angry/irritated

Repeat for 11c, 13c, 15c

16. When there's a lot of noise, what do you do?

- Do you go away?
- Put your hands over your ears?
- Tell the teacher?
- Do you need to raise your voice in order to be heard?

- No, go to next question
- if Yes      How often do you do that?

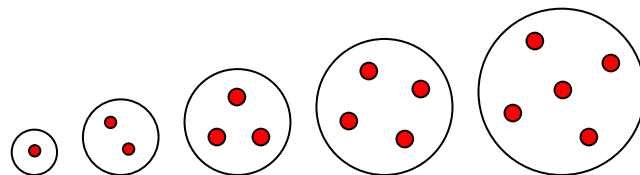

Almost never

Always

Repeat for 16a, 16b, 16c and 16d

18. The questions I am going to ask now are about how you have been feeling at preschool in the past few days.

- a) Have you had a headache?
- b) Have you had a tummy ache?
- c) Have your voice been hoarse?

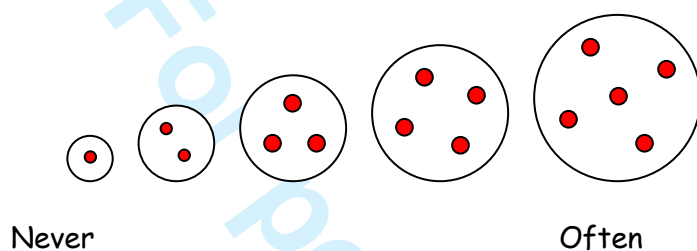

Repeat for 18a, 18b, 18c

19. In the past few days, have you felt like any of the children in this picture? Can you point at the one you felt like?

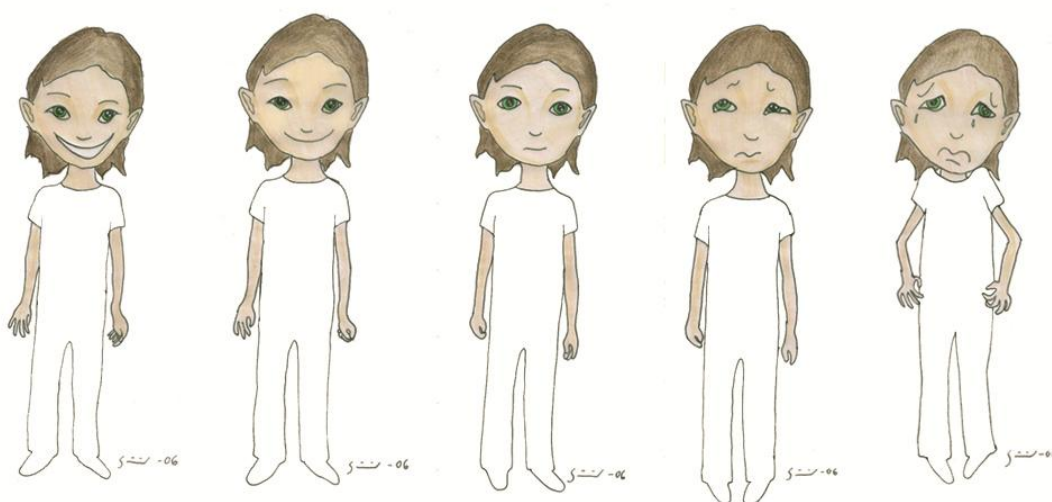

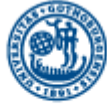

UNIVERSITY OF  
GOTHENBURG

Procedure for use of the Questionnaire: **INCH**

These questions are part of a questionnaire which was developed within the Sound Environment Research Unit at Gothenburg University under the leadership of Kerstin Persson Waye [www.amm.se/soundenvironment](http://www.amm.se/soundenvironment)

The full questionnaire can be obtained by contacting the first author.

The questionnaire can be used under the following conditions:

- The source should be mentioned e.g. this article.
- Manuscripts and articles dealing with results obtained with the questionnaire should be sent to [kerstin.persson.waye@amm.gu.se](mailto:kerstin.persson.waye@amm.gu.se)
- Part of the research data should be made available to the author of the questionnaire (in consultation with the author) for further validation.

## STARD checklist for the reporting of studies of diagnostic accuracy

| Section and Topic          | Item # |                                                                                                                                                                                                                                                           | On page #             |
|----------------------------|--------|-----------------------------------------------------------------------------------------------------------------------------------------------------------------------------------------------------------------------------------------------------------|-----------------------|
| TITLE/ABSTRACT/KEYWORDS    | 1      | Identify the article as a study of diagnostic accuracy (recommended MeSH heading 'sensitivity and specificity')                                                                                                                                           | I-II                  |
| INTRODUCTION               | 2      | State the research questions or study aims, such as estimating diagnostic accuracy or comparing accuracy between tests or across participant groups                                                                                                       | 1-2                   |
| <b>METHODS</b>             |        |                                                                                                                                                                                                                                                           |                       |
| <i>Participants</i>        | 3      | Describe the study population: The inclusion and exclusion criteria, setting and locations where the data were collected                                                                                                                                  | 4-5                   |
|                            | 4      | Describe participant recruitment: Was recruitment based on presenting symptoms, results from previous tests, or the fact that the participants had received the index tests or the reference standard?                                                    | 4-5                   |
|                            | 5      | Describe participant sampling: Was the study population a consecutive series of participants defined by the selection criteria in items 3 and 4? If not, specify how participants were further selected                                                   | As defined in 3 and 4 |
|                            | 6      | Describe data collection: Was data collection planned before the index test and reference standard were performed (prospective study) or after (retrospective study)?                                                                                     | Before-after study    |
| <i>Test methods</i>        | 7      | Describe the reference standard and its rationale                                                                                                                                                                                                         | na                    |
|                            | 8      | Describe technical specifications of material and methods involved including how and when measurements were taken, and/or cite references for index tests and reference standard                                                                          | 5                     |
|                            | 9      | Describe definition of and rationale for the units, cutoffs and/or categories of the results of the index tests and the reference standard                                                                                                                | 6-9                   |
|                            | 10     | Describe the number, training and expertise of the persons executing and reading the index tests and the reference standard                                                                                                                               | 5                     |
|                            | 11     | Describe whether or not the readers of the index tests and reference standard were blind (masked) to the results of the other test and describe any other clinical information available to the readers                                                   | na                    |
| <i>Statistical methods</i> | 12     | Describe methods for calculating or comparing measures of diagnostic accuracy, and the statistical methods used to quantify uncertainty (e.g. 95% confidence intervals)                                                                                   | 9                     |
|                            | 13     | Describe methods for calculating test reproducibility, if done                                                                                                                                                                                            | 9                     |
| <b>RESULTS</b>             |        |                                                                                                                                                                                                                                                           |                       |
| <i>Participants</i>        | 14     | Report when study was done, including beginning and ending dates of recruitment                                                                                                                                                                           | 4                     |
|                            | 15     | Report clinical and demographic characteristics of the study population (e.g. age, sex, spectrum of presenting symptoms, comorbidity, current treatments, recruitment centers)                                                                            | 10                    |
|                            | 16     | Report the number of participants satisfying the criteria for inclusion that did or did not undergo the index tests and/or the reference standard; describe why participants failed to receive either test (a flow diagram is strongly recommended)       | 10                    |
| <i>Test results</i>        | 17     | Report time interval from the index tests to the reference standard, and any treatment administered between                                                                                                                                               | 5                     |
|                            | 18     | Report distribution of severity of disease (define criteria) in those with the target condition; other diagnoses in participants without the target condition                                                                                             | na                    |
|                            | 19     | Report a cross tabulation of the results of the index tests (including indeterminate and missing results) by the results of the reference standard; for continuous results, the distribution of the test results by the results of the reference standard | na                    |
|                            | 20     | Report any adverse events from performing the index tests or the reference standard                                                                                                                                                                       | na                    |
| <i>Estimates</i>           | 21     | Report estimates of diagnostic accuracy and measures of statistical uncertainty (e.g. 95% confidence intervals)                                                                                                                                           | 12-15                 |
|                            | 22     | Report how indeterminate results, missing responses and outliers of the index tests were handled.                                                                                                                                                         | 7, 9                  |
|                            | 23     | Report estimates of variability of diagnostic accuracy between subgroups of participants, readers or centers, if done.                                                                                                                                    | na                    |
|                            | 24     | Report estimates of test reproducibility, if done                                                                                                                                                                                                         | 12-13                 |
| DISCUSSION                 | 25     | Discuss the clinical applicability of the study findings                                                                                                                                                                                                  | 15-18                 |

This checklist is found at: [www.consort-statement.org/checklist\\_test.pdf](http://www.consort-statement.org/checklist_test.pdf)

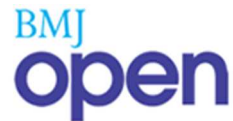

**Validation of a questionnaire measuring preschool children's reactions to and coping with noise in a repeated measurement design.**

|                                 |                                                                                                                                                                                                                                                                                                             |
|---------------------------------|-------------------------------------------------------------------------------------------------------------------------------------------------------------------------------------------------------------------------------------------------------------------------------------------------------------|
| Journal:                        | <i>BMJ Open</i>                                                                                                                                                                                                                                                                                             |
| Manuscript ID:                  | bmjopen-2012-002408.R1                                                                                                                                                                                                                                                                                      |
| Article Type:                   | Research                                                                                                                                                                                                                                                                                                    |
| Date Submitted by the Author:   | 15-Mar-2013                                                                                                                                                                                                                                                                                                 |
| Complete List of Authors:       | Persson Waye, Kerstin; Sahlgrenska academy, Gothenburg University, Department of Occupational and Environmental Medicine<br>van Kamp, Irene; National Institute for Public Health and the Environment, Centre for Environmental Health Research<br>Dellve, Lotta; Royal Institute of Technology, Ergonomics |
| <b>Primary Subject Heading</b>: | Occupational and environmental medicine                                                                                                                                                                                                                                                                     |
| Secondary Subject Heading:      | Public health                                                                                                                                                                                                                                                                                               |
| Keywords:                       | EPIDEMIOLOGY, Community child health < PAEDIATRICS, PUBLIC HEALTH                                                                                                                                                                                                                                           |
|                                 |                                                                                                                                                                                                                                                                                                             |

SCHOLARONE™  
Manuscripts



## Summary

### *Study Focus:*

- ✓ Only a few studies have been performed on how noise affects preschool children.
- ✓ A prerequisite to do so is a method to measure perception, emotional and bodily reaction and coping with noise in the preschool situation.
- ✓ This study explored the reliability and validity of such an instrument based on data derived from a before after intervention study which was carried out at seven preschools in Sweden.

### *Key Messages:*

- ✓ The results show that preschool children can indeed make a clear distinction between perception of and reaction to different types of noise and bodily reactions.
- ✓ Visual representation of emotional reactions and the location of bodily reactions is a good and reliable way to measure reactions in young children.
- ✓ More work on larger samples will need to be done to further develop a standard instrument to be used in preschool aged children.

### *Strength and weaknesses*

- ✓ The strength of this study lies in the fact that the questions posed to the children were based on focus group discussion and worded in their own “language”.
- ✓ A major limitation is the relatively small sample size.

## 26 INTRODUCTION

### 28 Background

29 Earlier studies show that the sound environment at preschools may be a  
30 serious occupational and public health problem. Voss <sup>1</sup> measured eight hour  
31 equivalent noise exposure levels of 80 dB  $L_{Aeq}$  in daycare centers in Denmark.  
32 Maxwell and Evans <sup>2</sup> report four hour  $L_{Aeq}$  levels of 76 dB and peak levels of 96 dBC  
33 in preschools in the USA. The World Health Organization (WHO) recommends a A-  
34 weighted equivalent noise level of 35 dB ( $L_{Aeq}$ ) at preschools in order not to disturb  
35 communication.<sup>3</sup> Dominant noise sources in preschools are sounds from children's  
36 activities indoors. In contrast to elementary schools, the sound environment in  
37 preschools is highly intermittent, uncontrollable and characterized by peak levels of  
38 high spectrum frequency, originating from voices and children's activities. In order to  
39 describe the sound environment the equivalent noise level  $L_{Aeq}$  is used to represent an  
40 average sound pressure level over a given time, while the highest sound pressure  
41 levels of the intermittent sounds are better described by their maximum noise levels  
42 ( $L_{AFmax}$ ) or peak levels ( $L_{Cpeak}$ ).

43 Acoustical improvements in preschools and schools are most often made by  
44 fitting walls and ceiling with sound absorption panels. The calculated direct effects  
45 are a reduction of the reverberation time -the time it takes for a sound to decay 60 dB  
46 from its original intensity- and moderate reduction of sound level.<sup>4,5</sup>

47 Noisy preschool environments could lead to reduced understanding of speech  
48 and as a consequence impaired reading and writing abilities.<sup>2</sup> Exposures at a young  
49 age might also affect other aspects of later life functioning and the development of  
50 disease. Effects described in the literature indicating such a mechanism pertain to

1  
2  
3 51 hearing impairment<sup>3,6</sup> and increased levels of cortisol in children attending day care  
4  
5 52 centers.<sup>7,8,9</sup> In preschool children also an association was found between noise  
6  
7 53 levels at school and observed hoarseness, breathy voice and vocal hyperfunction.<sup>10</sup>  
8  
9  
10 54 Studies in older children have confirmed effects on reading comprehension and  
11  
12 55 memory<sup>11</sup>, performance<sup>12</sup>, coping, wellbeing and stress<sup>13,14</sup>, and behavior and  
13  
14 56 mental health.<sup>15</sup>

15  
16 57 Reactions to and coping with environmental noise have been studied  
17  
18 58 extensively in the past 30-40 years for adults.<sup>16</sup> Several recent studies also addressed  
19  
20 59 annoyance and coping in school children,<sup>12,13,17,18,19,20,21</sup> while only a handful of  
21  
22 60 studies addressed this issue in younger (preschool) children.<sup>2,22,23,24</sup> In comparison  
23  
24 61 with adults, children in general and preschool children in specific may be particularly  
25  
26 62 susceptible to the effects of noise because they have less capacity to anticipate,  
27  
28 63 understand and cope with stressors<sup>20</sup> and because they are in a crucial and sensitive  
29  
30 64 phase of their development.<sup>3,11</sup>

31  
32  
33  
34 65 Instruments to investigate young children's reactions to noise are not  
35  
36 66 available. In order to fill this gap and in preparation of the development of such an  
37  
38 67 instrument a qualitative study was performed in 2006 among 36 preschool children in  
39  
40 68 Mölndal (Sweden), aged 4-6 years<sup>25</sup> using the constructivist-grounded theory as  
41  
42 69 qualitative approach.<sup>26</sup> The children were asked about their perception of sound in  
43  
44 70 the preschool situation, their understanding of the source and their perceived reactions  
45  
46 71 at emotional and bodily level. Also, the degree of familiarity and comprehensibility of  
47  
48 72 the sounds, manageability/control as well as disturbance and distress by the sounds  
49  
50 73 were addressed. Finally, several coping strategies came forward, subdivided in  
51  
52 74 avoidance (getting away, covering ears etc) and problem- oriented coping (complain  
53  
54 75 to teacher). The method employed was in broad lines comparable to that used by  
55  
56  
57  
58  
59  
60

1  
2  
3 76 Haines et al.<sup>12</sup> in children aged 10-13. She concluded that noise annoyance in children  
4  
5 77 pertains to the same construct as in adults, and this was later confirmed by others.<sup>13,</sup>  
6  
7 78 <sup>16, 17, 18</sup> It is uncertain whether younger children are also able to make such distinctions  
8  
9  
10 79 and thus show a comparable pattern to older children and adults, nor whether they are  
11  
12 80 capable to answer questions during a structured interview regarding their sound  
13  
14 81 environment and the way they emotionally and physically are affected by it in a  
15  
16 82 consistent way.  
17  
18  
19  
20

## 21 **Objectives**

22  
23 85 This paper aims to describe and explore the reliability and validity of the key  
24  
25 86 questions of a structured interview developed for preschool children. The questions  
26  
27 87 pertain to preschool children's perception of noise when at school, their bodily and  
28  
29 88 emotional reaction to it, non-specific (stress related) symptoms and their coping  
30  
31 89 strategies used to diminish detrimental effects of the noise. Aspects related to  
32  
33 90 perceived control and behavioral reactions were left out of the interview, since it was  
34  
35 91 felt that observational methods to measure these aspects would be more suitable to  
36  
37 92 apply in this age group. Bodily reactions to noise in general as well as noise specific  
38  
39 93 reactions were used to examine the external validity of the children's responses.  
40  
41  
42  
43  
44

## 45 **MATERIALS AND METHODS**

### 46 **Selection and recruitment**

47  
48  
49 97 In the period between October 2006 to October 2009 children aged 4-5 and their  
50  
51 98 parents were recruited from seven preschools where interventions were undertaken  
52  
53 99 with the purpose to improve the acoustical qualities in the preschools in Mölndal,  
54  
55  
56 100 Sweden. In total, 63 children and 59 parents filled out the questionnaire before and  
57  
58  
59  
60

1  
2  
3 101 after the intervention. The response rates ranged from 80% in the parents to 98% in  
4  
5 102 the children. Of the children two fell outside the age range of 4-5 years and were  
6  
7 103 excluded from further analysis, resulting in a study population of 61 children. Parents  
8  
9 104 signed an informed consent for their children according to the Declaration of Helsinki.  
10  
11 105 The study was approved by the Ethics Committee of Göteborg, Sweden.  
12  
13  
14  
15  
16

### 107 **Procedure**

108 One month before and three months after the intervention the children were  
109 interviewed. In order to diminish the risk of inter-rater variance the interviews were  
110 performed by two trained persons. The interview took on average 20 minutes and the  
111 form was filled in directly by the interviewer. The children were asked questions in a  
112 structured way and presented with visual representations of scales on show cards. The  
113 answers were filled in by the interviewer directly. When the child was not able to  
114 answer the question they were not prompted to do so. For the core set of questions see  
115 Appendix 1. For information about the full protocol please contact the first author.  
116

### 117 **Study population**

118 Table 1 shows the distribution of age and gender of the children included in the  
119 analysis. The 61/59 children respectively included in the before – after study are  
120 reasonably well distributed over gender and age groups. All children aged 4 to 6 years  
121 were asked to participate in the interview, the number of children that took part in the  
122 interview per preschool ranged from 4 to 15.  
123

124 Table 1: General characteristics of the children (Before and After intervention).

| Characteristic                   | Before | After |
|----------------------------------|--------|-------|
| <b>Number of Respondents (n)</b> | 61     | 59    |
| <b>Gender</b>                    |        |       |
| girls                            | 48%    | 49%   |
| boys                             | 52%    | 51%   |
| <b>Age</b>                       |        |       |
| 4 years                          | 52%    | 32%   |
| 5 years                          | 48%    | 49%   |
| 6 years                          | -      | 8%    |

125

126

127 **Noise exposure assessment and interventions**

128

129 Noise was measured one month before and three months after the intervention using  
 130 stationary noise level meter (Bruel and Kjaer 2261) with the microphone hanging 0.5  
 131 meters from the ceiling and personal dosimeters (Larson and Davies Sparks 705+)  
 132 mounted on the left shoulder of personnel and children in seven preschools. The  
 133 methods are described in more details elsewhere.<sup>27,28</sup> Stationary measurements during  
 134 activity in the various rooms showed a moderate reduction of equivalent A-weighted  
 135 level. The average reduction after the intervention as compared to before varied  
 136 between 1.2 to 3.8 dB ( $L_{Aeq}$ ) depending on the room. Children's dosimeters showed  
 137 that personal average exposures were high and in the range of 83-85 dB ( $L_{Aeq}$ ) and  
 138 117-118 dB ( $L_{AFmax}$ ) both before and after the intervention, hence the intervention did  
 139 not affect personal levels in a measurable way.

140

141

142 **Noise perception**

56

57

58

59

60

1  
2  
3 143 Noise perception was measured by means of standard questions. Children were asked  
4  
5 144 how frequently they heard noise from three relevant noise sources in the preschool  
6  
7 145 situation: angry and yelling children, strong and loud sounds and scraping and  
8  
9  
10 146 screeching sounds. Answers were indicated on a five -point Likert scale (ranging  
11  
12 147 from '*almost never to very often*') presented as 5 circles increasing in size and  
13  
14 148 including 1 to 5 dots.

149

### 150 **Reaction to noise**

151 Aspects of reaction were measured using the following wording: '*How do you*  
152 *feel when\* you hear the [sounds of angry, yelling children][loud and strong sounds]*  
153 *[scraping and screeching sounds]*. Answers were indicated on a bipolar visual scale  
154 representing drawn figures with different facial and bodily expressions ranging from  
155 glad/safe to sad/afraid and from kind/friendly to angry/irritated respectively. The  
156 reaction was recoded to neutral position (code 3) for those children who indicated on  
157 the previous question on perception, that they did not hear the sound.

158 Figure 1 Here

159

### 160 **Coping strategies**

161 For noise experienced at preschool, coping strategies were investigated by asking the  
162 children what they did when there was a lot of noise and if they coped, how often that  
163 was. The phrasing was as follows: '*When there is a lot of noise what do you do*' [*go*  
164 *away*], [*put your hands over your ears*][*tell your teacher*] [*raise your voice*]*and if so*  
165 *how often [almost never to all the time]*. First the answers No or Yes could be given.  
166 If the answer was Yes, they were asked to indicate how often on a five -point Likert

1  
2  
3 167 scale (ranging from 'almost never to very often') presented as 5 circles increasing in  
4  
5 168 size and including 1 to 5 dots.  
6  
7  
8  
9  
10  
11  
12  
13

169

170

171

## 172 **Bodily reactions to noise and symptoms**

173 In order to measure bodily reactions to the three different sounds, the children were  
174 asked to indicate per sound source whether they could feel the sounds in their body  
175 and if so where they felt it (Figure 2) ('when you hear [angry and yelling sounds],  
176 [strong and loud sounds],[ scraping and screeching sounds] can you feel it inside you  
177 or in your body and if so please point out in the figure where you feel it'). The  
178 answers were recoded into location [head] [neck] [arms] [heart] [belly] [legs] [feet]  
179 as well as in number of locations (none versus 1 or more).  
180

180

181

Figure 2 Here

182

183 Nonspecific symptoms were inventoried by asking the children what  
184 symptoms they had experienced in the past few days at preschool: headache, tummy  
185 ache and hoarse voice. Finally a question was asked about general wellbeing, making  
186 use of a similar figures used for reaction to noise ['in the last days at preschool' have  
187 you felt like any of these children in this picture] which was recoded into a 1 to 5  
188 scale.  
189

189

## 190 **Data analysis**

190

191

192



1  
2  
3 191 In order to test the convergent and divergent validity of the different indices, as a first  
4  
5 192 step, confirmative factor analysis (CFA) was carried out using SAS for Windows  
6  
7 193 (version 9.3) on the reaction and coping questions and perceived health questions.  
8  
9 194 Bodily sensation and health symptoms were included, in order to determine whether  
10  
11 195 children could distinguish between emotional and bodily responses and nonspecific  
12  
13 196 symptoms/ health complaints. Also the items on the questions regarding coping  
14  
15 197 strategies were included in the analysis. A high correlation was expected between  
16  
17 198 reactions (both bodily and emotional) to different noise sources, between symptoms  
18  
19 199 and the different coping strategies. CFA is a special form of factor analysis which is  
20  
21 200 used to test whether measures of a construct are consistent with a researcher's  
22  
23 201 understanding of the nature of that construct (or factor) and therefore suitable for our  
24  
25 202 purpose. The degree of consistency is expressed by several statistical quantities  
26  
27 203 determining the adequacy of model fit to the data, including the standardized root  
28  
29 204 mean square residual (SRMSR) and the adjusted goodness of fit (AGFI). Acceptable  
30  
31 205 model fit is indicated by a SRMSR value of 0.08 or less<sup>29</sup> and an AGFI value of 0.95  
32  
33 206 or more.<sup>30</sup> The contribution of each item to a factor is expressed in factor loadings.  
34  
35 207 Due to small sample size and departure from normality, diagonally weighted least  
36  
37 208 squares were used to estimate the parameters of the factor model.  
38  
39 209 In order to test the internal consistency of the components, Cronbach's alphas were  
40  
41 210 calculated on the grouped items. Indices were composed by simply summing the  
42  
43 211 separate items. These indices were further tested on their concurrent validity by  
44  
45 212 comparing groups with one or more symptoms due to the different noise sources to a  
46  
47 213 group who reported no symptoms. This was performed for the before condition only  
48  
49 214 by means of a t-test assuming unequal variances. Additional analyses were performed  
50  
51 215 on some relevant single items, which were excluded from CFA using nonparametric  
52  
53  
54  
55  
56  
57  
58  
59  
60

216 methods such as Spearman and Mann-Whitney. Limiting factor for all analysis is the  
 217 relatively small sample size. Traditional psychometrics advises that there should be at  
 218 least 10 respondents per item, but sample sizes between 50 and 100 subjects are  
 219 usually considered adequate to evaluate the psychometric properties of measures of  
 220 social constructs.<sup>31</sup>

## 222 RESULTS

223 Table 2 shows the prevalence of noise perception, presented per noise source, and  
 224 emotional reaction, total coping strategies and symptoms.

225 Table 2: Prevalence of noise perception, reaction, symptoms and coping

| Characteristic                                  | Before (n=61) | After (n=59) |
|-------------------------------------------------|---------------|--------------|
| <b>Perception noise source *</b>                |               |              |
| Angry and yelling: Source 1                     | 67%           | 58%          |
| Loud and strong: Source 2                       | 57%           | 51%          |
| Scraping and Screeching: Source 3               | 35%           | 18%          |
| <b>Location bodily reaction</b>                 |               |              |
| At least 1 location                             | 70%           | 80%          |
| Source 1                                        | 54%           | 49%          |
| Source 2                                        | 54%           | 56%          |
| Source 3                                        | 51%           | 49%          |
| <b>Angry reaction (score over 11)**</b>         | 13%           | 5%           |
| <b>Prevalence of symptoms (score over 11)**</b> | 7%            | 4%           |
| <b>Coping (score over 15)**</b>                 | 13%           | 16%          |

226 \* percentage of percentage of children scoring in the highest two categories

227 \*\* percentage of children scoring in the highest two categories per sum-score

229 The percentage of children indicating they never heard the sound was 17% and 19%  
 230 for the angry and yelling sounds, 22% and 22% for loud sounds and 35% and 52 %  
 231 for the scraping and screeching sounds in the before and after condition respectively.

## 233 Reaction and coping in children: construct validity

1  
2  
3 234 Confirmatory factor analyses (CFA) with categorical indicators were carried out to  
4  
5 235 verify the a-priori structure pertaining to perception, emotional reaction, symptoms  
6  
7 236 and coping strategies in the before and after condition. The perception scales [*How*  
8  
9 237 *often do you hear angry and yelling children, strong and loud sounds and scraping*  
10  
11 238 *and screeching sounds*] as well as the sad reaction scales showed to be too unstable to  
12  
13  
14 239 consider for further analysis. Likewise, the items pertaining to noise perception per  
15  
16 240 source and low wellbeing were too unstable or loaded on many factors and were  
17  
18 241 therefore treated as single items in further analysis (see Table 3). A three factor model  
19  
20  
21 242 was fitted to the remaining ten items pertaining to angry reactions, symptoms and  
22  
23 243 coping. The model fit was good with a SRMSR of .08 and an AGFI of .97 in the  
24  
25 244 before condition, but weaker in the after condition with a SRMSR of .12 and an AGFI  
26  
27 245 of .91. For the before condition the loading are in the ranges .58 to .77, .41 to .78 and  
28  
29 246 .51 to .71 for the three factors respectively. It was decided to take the before analysis  
30  
31 247 as a point of departure and to test the reliability of the scales based on the  
32  
33  
34 248 measurements in the before and after condition.  
35  
36  
37 249

250 Table 3: Factor Loadings, Goodness of Fit, internal consistency and interrelations

|                                              | Components/Before |        |         | Components/After |        |         |      |
|----------------------------------------------|-------------------|--------|---------|------------------|--------|---------|------|
|                                              | Reaction          | Coping | Symptom | Reaction         | Coping | Symptom |      |
| Source1_angry                                | .63               |        |         | .33              |        |         |      |
| Source2_angry                                | .77               |        |         | .55              |        |         |      |
| Source3_angry                                | .58               |        |         | .73              |        |         |      |
| go away                                      |                   | .78    |         |                  | .32    |         |      |
| cover ears                                   |                   | .52    |         |                  | .46    |         |      |
| tell teacher                                 |                   | .41    |         |                  | .62    |         |      |
| raise voice                                  |                   | .57    |         |                  | .72    |         |      |
| headache                                     |                   |        | .71     |                  |        | .53     |      |
| tummy ache                                   |                   |        | .67     |                  |        | .18     |      |
| hoarse voice                                 |                   |        | .51     |                  |        | .61     |      |
| Cronbach's alpha                             | .63               | .65    | .67     | .56              | .54    | .52     |      |
| SRMSR                                        | .08               |        |         | .12              |        |         |      |
| AGFI                                         | .97               |        |         | .91              |        |         |      |
| <b>BEFORE</b>                                | a                 | b      | c       | d                | e      | f       | g    |
| a. Perception yelling children               | 1                 | .48*   | .19     | .09              | .11    | .23*    | -.12 |
| b. Perception loud and strong sounds         |                   | 1      | .30*    | .24*             | .25*   | .33*    | .00  |
| c. Perception scraping and screeching sounds |                   |        | 1       | .23*             | .37*   | .25*    | .23* |
| d. Angry reaction                            |                   |        |         | 1                | .33*   | .15     | .22* |
| e. Symptoms                                  |                   |        |         |                  | 1      | .34*    | .56* |
| f. Coping strategies                         |                   |        |         |                  |        | 1       | -.10 |
| g. Low wellbeing                             |                   |        |         |                  |        |         | 1    |

251 \* Significant at .05 level/missing values pairwise deletion

252

253

1  
2  
3 **254 Reliability in terms of internal consistency**  
4

5 255 Three groups of variables pertaining to Angry Reaction, Coping and Symptoms were  
6  
7 256 tested on their internal consistency expressed in alpha for the two measurements  
8  
9  
10 257 (Table 3 row 11). The analysis yielded homogeneous scales with comparable alpha's  
11  
12 258 over the measurements ranging from .56 to .75. The relatively low alpha's in the after  
13  
14 259 condition are partly due to test length and imply the risk to underestimate/attenuate  
15  
16 260 the relationships between the variables and other variables.<sup>32</sup> However, based on the  
17  
18 261 findings in the before condition it was considered justified to compose three indices  
19  
20  
21 262 by summing the scores on the separate items within each factor and to test  
22  
23 263 distributions on normality. Deviations of normality were slight and most pronounced  
24  
25 264 in the symptom scales.

26  
27 265 Correlation analyses between these indices and items related to perception of noise  
28  
29 266 and low wellbeing were studied for the before situation only (Table 3) and showed  
30  
31 267 moderate to weak associations between perception and outcomes, but mostly in line  
32  
33 268 with our expectations. Perception of scraping and screeching sounds was most  
34  
35 269 strongly associated with angry reactions, coping, symptoms as well as low wellbeing  
36  
37  
38 270 followed by perceived loud sounds. Coping strategies were associated most strongly  
39  
40 271 with symptoms and the highest association was found between symptoms and low  
41  
42 272 wellbeing. Since items referring to sad reactions to the different sounds did not form  
43  
44 273 one factor and the bipolar items do not allow for correlational analysis, separate  
45  
46 274 analysis was performed after dichotomizing the scores on sad reaction items. Mann-  
47  
48 275 Whitney analysis showed that sadness due to loud noises was associated with  
49  
50 276 symptoms ( $Z$ -value=2.3/ $p$ =.021) and sad reaction due to scraping/screeching sounds  
51  
52 277 with symptoms ( $Z$ -value=3.4/ $p$ =.001) and coping strategies ( $Z$ -value=2.7/ $p$ =.008),  
53  
54  
55  
56  
57  
58  
59  
60

1  
2  
3 278 while sadness due to yelling sounds was found not to be associated with any of the  
4  
5 279 indices on angry reaction, symptoms or coping.  
6  
7

8 280  
9

10  
11 281 **Concurrent validity**  
12

13 282 As a last step in the psychometric evaluation, the associations between bodily  
14  
15 283 reactions to noise and the three indices and the single item low wellbeing were  
16  
17 284 analyzed to explore the concurrent validity. This refers to the accuracy of the relevant  
18  
19 285 test scores to estimate an individual state on a criterion, in this case bodily reaction  
20  
21 286 (general and noise source specific).  
22  
23

24 287 The rationale behind this analysis is that angry reaction, amount of coping strategies  
25  
26 288 (number and frequency) and symptoms as well as low wellbeing are expected to be  
27  
28 289 associated with bodily reactions. The associations between bodily reactions to noise  
29  
30 290 with these relevant test-scores were studied by means of t-test. Hereby dichotomous  
31  
32 291 groups were formed based on respectively any bodily reaction, and bodily reactions  
33  
34 292 per noise source versus none. Distributions were checked per group and angry  
35  
36 293 reaction was dropped from the analysis because the majority of data points in the  
37  
38 294 group with no bodily reaction contained only children who had indicated they did not  
39  
40 295 hear the sound. Subsequently, the mean scores on the remaining indices and the low  
41  
42 296 wellbeing item were compared between groups. Table 4 presents the results.  
43  
44  
45

46 297  
47  
48  
49  
50  
51  
52  
53  
54  
55  
56  
57  
58  
59  
60

298 Table 4. Bodily reaction and children's coping, symptoms and low wellbeing (before  
299 condition)  
300

|                   | Bodily reaction to any source | Bodily reaction to yelling sounds | Bodily reaction to loud sounds | Bodily reaction to scraping and screeching sounds |
|-------------------|-------------------------------|-----------------------------------|--------------------------------|---------------------------------------------------|
| Symptom           | -4.67**                       | -2.18*                            | -2.34*                         | 2.69*                                             |
| Coping strategies | -2.62*                        | -2.58*                            | -1.53                          | -2.04*                                            |
| Low wellbeing     | -1.97                         | -2.34*                            | -1.05                          | -1.50                                             |

301 Observed t-statistic/p-value < 0.05 marked as \* and p<0.001 marked as \*\*  
302

303  
304 T-test yielded significant differences in means on symptoms before for groups based  
305 on presence of any bodily reactions as well as presence of bodily reaction to the  
306 separate sources. The same pattern was found for coping with the exception of loud  
307 sounds. Low wellbeing when at school in the before condition, measured with a single  
308 item, showed to be associated significantly with bodily reaction to loud sounds only,  
309 while any bodily reaction just failed significance. In the after condition this pattern  
310 was only partly confirmed for symptoms with any bodily reaction and low wellbeing  
311 with any bodily reaction. Since t-test assumes normal distribution, in addition non  
312 parametric tests were applied. Further analysis showed that each hypothesis with p-  
313 value <0.05 for the t-test had Mann-Whitney p-values not exceeding 0.08.  
314

## 315 DISCUSSION

316 The results of the psychometric evaluation indicate that preschool children are able to  
317 make a distinction between reactions to noises and emotional and bodily reactions as  
318 measured by means of visual representations of reactions and representation of the  
319 location of bodily reactions. As in adults<sup>33</sup>, the interrelations between angry reactions  
320 to different sounds and noises were relatively high, while the relation between angry

1  
2  
3 321 reactions and symptom related aspects was lower: in other words reaction and  
4  
5 322 symptoms can be considered as separate dimensions. This is also consistent with the  
6  
7 323 findings among school children (9-11 years) in the RANCH study<sup>18</sup> and a survey  
8  
9 324 among 207 children (aged 13-14 years).<sup>34, 36</sup> Furthermore, the results are in  
10  
11 325 agreement with the results of a RANCH sub-study<sup>35</sup> in which it was found that  
12  
13 326 children were capable to reliably index complex soundscapes and to provide  
14  
15 327 perceptual scales that were in striking agreement with the perceptual scales provided  
16  
17 328 by adults. We also found that angry reactions to noise could be distinguished from  
18  
19 329 coping strategies. Comparing the elements of the correlation matrix in the before  
20  
21 330 condition for perceptions of the different sound sources and its effects we conclude  
22  
23 331 that scraping and screeching sounds play a prominent role, with significant  
24  
25 332 associations for angry reaction, coping and symptoms. Whilst coping was  
26  
27 333 significantly associated with all sounds, angry and loud sounds were not associated  
28  
29 334 with angry reaction or symptoms. Based on the pattern we hypothesize that there is a  
30  
31 335 pathway from perception of scraping and screeching sounds via angry reactions and  
32  
33 336 coping to symptoms and via symptoms to low wellbeing.

34  
35  
36  
37  
38 337 An important finding is that children compared to adults seem to have a  
39  
40 338 tendency to describe reaction to noise in a somatic way: they literally feel the noise in  
41  
42 339 their body, especially in the head, heart and tummy.

43  
44  
45 340 Both the (angry) reaction and symptoms indices are significantly associated  
46  
47 341 with general low wellbeing while at school and these responses tend to be sound  
48  
49 342 specific. While loud and yelling sounds are only associated with coping, the  
50  
51 343 perception of scraping and screeching sounds is significantly associated with angry  
52  
53 344 reactions, coping as well as symptoms. This finding is important in view of future  
54  
55 345 interventions at preschools as scraping and screeching sounds mainly originate from  
56  
57  
58  
59  
60



1  
2  
3 346 friction between surfaces, such as chairs being pulled across the floor or table wares  
4  
5 347 moved on the table top. To our knowledge no standards exist that give guidance on  
6  
7 348 how to predict these sounds, which makes them problematic to systematically address.  
8  
9 349 The four coping items included in the questionnaire pertain to active and avoidant  
10  
11 350 behavior, a distinction which is confirmed in studies among older children and adults,  
12  
13 351 but also came forward from the focus group discussions with children.<sup>24</sup> Results of  
14  
15 352 CFA analysis showed a high inter correlation between the different coping strategies,  
16  
17 353 with a slight tendency for a two sub-factors structure, pertaining to problem oriented  
18  
19 354 coping and avoidance. This has implications for the interpretation of the coping index:  
20  
21 355 it refers to the number and frequency of strategies employed rather than more or less  
22  
23 356 effective strategies to cope with environmental noise. Future work should attempt to  
24  
25 357 expand the number of items related to these different strategies which young children  
26  
27 358 employ to cope with classroom noise.

28  
29 359 Explorative comparison of children's symptom report and bodily reactions  
30  
31 360 reveal a reasonable consistent pattern and indicate satisfactory concurrent validity of  
32  
33 361 most of the indices for the before situation.

34  
35 362 The strength of this study lies in the fact that the questions posed to the  
36  
37 363 children were based on focus group discussion and worded in their own "language".  
38  
39 364 A major limitation is the relatively small sample size. Future research on larger  
40  
41 365 groups of preschool children will be needed to further refine the questions in  
42  
43 366 particular the questions pertaining to well-being and coping. Such an instrument will  
44  
45 367 allow for studying development in reaction over time as well as the evaluation of  
46  
47 368 noise reducing measurements in preschool in an unobtrusive and playful manner.

48  
49 369 Previous studies suggest that children have fewer possibilities for controlling  
50  
51 370 noise or have a less developed coping repertoire than adults.<sup>20, 23</sup> Development of  
52  
53  
54  
55  
56  
57  
58  
59  
60

1  
2  
3 371 coping strategies would be an important target for future research in this group: noise  
4  
5 372 induced behaviors at a young age (e.g. learned helplessness) might affect other  
6  
7 373 aspects of later life functioning and the development of disease. Furthermore, this  
8  
9  
10 374 study shows that emotional reaction (angry and sad) is not the only relevant indicator  
11  
12 375 of the effects of community noise in children, also bodily reactions, symptoms,  
13  
14 376 coping behavior and wellbeing show to be important.  
15

16  
17 377

## 18 378 **CONCLUSION**

19  
20 379 The main conclusion to be drawn from this study is that young children's angry  
21  
22 380 reaction and bodily reactions to and coping with noise can be reliably measured with a  
23  
24 381 structured interview, including visual representation questions. In accordance with  
25  
26 382 what was found in adults<sup>33</sup> and children aged 9-11<sup>18,21</sup> we found that also younger  
27  
28 383 children are able to distinguish between emotional reactions, symptoms, coping and  
29  
30 384 wellbeing. Compared to adults, younger children tend to describe their reactions to  
31  
32 385 noise in a somatic way. After further development of the instrument discussed in this  
33  
34 386 paper we foresee studies into young children's reactions to and coping with noise on a  
35  
36 387 larger scale.  
37  
38  
39

## 40 41 42 388 **Acknowledgements**

43  
44 389 We are grateful to Agneta Agge and Lena Samuelsson for their competence in  
45  
46 390 carrying out the interviews. We also want to thank the participating children and their  
47  
48 391 parents. The study was funded by the Swedish Council for Working Life and Social  
49  
50 392 research.  
51  
52  
53  
54  
55  
56  
57  
58  
59  
60

## 393 REFERENCES

- 394 1. Voss P. Noise in children's day care centers. AkustikNet A/S, 2005,23-25  
395 Denmark. [www.akustiknet.dk](http://www.akustiknet.dk), date accessed 2012-11-26.
- 396 2. Maxwell LE, Evans GW. The effects of noise on preschool children's  
397 prereading skills. *J Environ Psychol* 2000;**20**:91-97.
- 398 3. Berglund, B., T. Lindvall, et al. (1999). *Guidelines for community noise*,  
399 World Health Organisation (WHO).
- 400 4. Kawai K. *Effect of sound absorption on indoor sound environment of nursery*  
401 *school classrooms*. In: Burgess M, ed. Proceedings of 20th International  
402 Congress on Acoustics, ICA, Sydney, Australia 2010.
- 403 5. Berg F, Blair J, Benson P. Classroom acoustics: The problem, impact, and  
404 solution. *Lang Speech Hear Serv Schools* 1996;**27**:16-20.
- 405 6. Passchier-Vermeer W. Noise and Health of Children. Report  
406 PG/VGZ/2000.042. Leiden: *Netherlands Organization for Applied Scientific*  
407 *Research* (TNO) 2000.
- 408 7. Dettling AC, Parker SW, Lane SK, et al. Quality of care and temperament  
409 determine whether cortisol levels rise over the day for children in full-day  
410 child care. *Psychoneuroendocrinology* 2000;**25**:819-836.
- 411 8. Evans GW. The Environment of Childhood Poverty. *Am Psychol* 2004;**59**:77-  
412 92.
- 413 9. Blair C, Granger D, Peters Razza R. Cortisol Reactivity Is Positively Related  
414 to Executive Function in Preschool Children Attending Head Start. *Child Dev*  
415 2005 ;**76**:554-567.
- 416 10. McAllister, Svante Granqvist, Peta Sjölander and Johan Sundberg, Child  
417 Voice and Noise: A Pilot Study of Noise in Day Cares and the Effects on 10  
418 Children's Voice Quality According to Perceptual Evaluation, *Journal of*  
419 *Voice* 2009;(23), **5**: 587- 593.
- 420 11. Stansfeld SA, Berglund B, Clark C, et al. Aircraft and road traffic noise and  
421 children's cognition and health: a cross-national study. *Lancet* 2005;**365**:  
422 1942-9.
- 423 12. Haines MM, Brentnall SL, Stansfeld SA, et al. Qualitative responses of  
424 children to environmental noise. *Noise & Health* 2003;**5**:19-30.
- 425 13. Lercher P, Evans G W, Meis M et al. Ambient neighbourhood noise and  
426 children's mental health *Occup Environ Med* 2002;**59**:380-386.
- 427 14. May M, Emond A, Crawley E. Phenotypes of chronic fatigue syndrome in  
428 children and young people. *Arch Dis Child*, 2010;**4**:245-249.
- 429 15. Stansfeld SA. *The effects of noise on health; new challenges and*  
430 *opportunities*. In: Institute of Acoustics eds. Proceedings of the 8th European  
431 Conference on Noise Control, Euronoise, Edinburgh UK, 2009. ISBN:  
432 9781615676804.
- 433 16. Clark C, Stansfeld SA. The effect of transportation noise on health and  
434 cognitive development: a review of recent evidence. *Int J Comp Psychol* 2007;  
435 **20**:145-158.
- 436 17. Babisch W, Schulz C, Seiwert M. et al. Noise annoyance as reported by 8-14  
437 year old children. *Environ Behav* 2012;**44**:68-86.
- 438 18. Van Kempen EMM, Kamp I van, Stellato R. et al. Children's annoyance  
439 reactions to aircraft noise and road traffic noise: the RANCH-project. *J Acoust*  
440 *Soc Am*, 2009;**125**:895-904.

19. Lercher P, Evans GW, Meis M. Ambient Noise and Cognitive Processes among Primary Schoolchildren. *Environ Behav* 2003;**35**:725-735.
20. Bstrup ML. Prevention of adverse effects of noise on children. *Noise & Health* 2003;**5**:59-65.
21. Haines MM, Stansfeld SA, Job RFS. et al. Chronic aircraft noise exposure, stress responses, mental health and cognitive performance in school children. *Psychol Med* 2001;**31**:265-277.
22. Regecová V, Kellerová E. Effects of urban noise pollution on blood pressure and heart rate in preschool children. *J Hypertens* 1995;**13**:405-12.
23. Belojevic G, Jakovljevic B, Vesna S, et al. Urban road-traffic noise and blood pressure and heart rate in preschool children. *Environ Int* 2008;**34**:226-231.
24. Maxwell, LE. Preschool and day care environments. In: Lueder R, Rice V eds. *Child Ergonomics*, New York: Taylor and Francis 2007:653-688.
25. Dellve L, Samuelsson L, Persson Wayne K. Preschool children's experience and understanding of their soundscape. *Qual Res Psychol* 2013;**10**:1-13.
26. Charmaz K. *Constructing grounded theory: a practical guide through qualitative analysis*. Thousand Oaks SAGE Publications 2006
27. Persson Wayne K, Larsson P, Hult M. *Perception and measurement of preschool sound environment before and after acoustic improvements*. In: Bolton J S ed. 38th International Congress and Exposition on Noise Control Engineering, INTER-NOISE, Ottawa, Canada 2009.
28. Persson Wayne K, Agge A, Hillström J et al *Being in a preschool sound environment- annoyance and subjective symptoms among personnel and children. Perception and measurement of preschool sound environment before and after acoustic improvements*. In: 39th International Congress and Exposition on Noise Control Engineering, INTER-NOISE Lisbon Portugal 2010.
29. Hu L, Bentler PM. Cutoff criteria for fit indexes in covariance structure analysis: Coventional criteria versus new alternatives. *Struct Equ Modeling* 1999;**6**:1-55.
30. Shevlin M, Miles J. N. V. Effects of sample size, model specification and factor loadings on the GFI in confirmatory factor analysis. *Pers Individ Dif* 1998;**25**:85-90.
31. Sapnas, K. G. and R. A. Zeller (2002). "Minimizing sample size when using exploratory factor analysis for measurement." *Journal of nursing measurement* 2002;**10**(2): 135-154.
32. Schmitt, Neal (1996) Uses and Abuses of Coefficient Alpha *Psychological Assessment* 1996 **8** (4): 350-353
33. Van Kamp I. *Indicators of annoyance: a psychometric approach; the measurement of annoyance and interrelations between different measures*. In: Boone R, ed. International Congress and Exposition on Noise Control Engineering, INTER-NOISE Den Haag, the Netherlands, 2001.
34. Boman E, Enmarker I. Factors affecting pupils' noise annoyance in schools: the building and testing of models. *Environ Behav* 2004;**36**:207-28.
35. Gunnarsson AG, Berglund B, Haines M, et al. *Psychological restoration in noise*. In: Jong RG, de, Houtgast T, Franssen EAM et al eds. proceedings of the 8th International Congress on Noise as a Public Health Problem. Rotterdam, the Netherlands, 2003:159-60.
36. Enmarker I, Boman E. Noise annoyance responses of middle school pupils and teachers. *J Environ Psychol* 2004;**24**:527-36.

1  
2  
3  
4  
5  
6  
7  
8  
9  
10  
11  
12  
13  
14  
15  
16  
17  
18  
19  
20  
21  
22  
23  
24  
25  
26  
27  
28  
29  
30  
31  
32  
33  
34  
35  
36  
37  
38  
39  
40  
41  
42  
43  
44  
45  
46  
47  
48  
49  
50  
51  
52  
53  
54  
55  
56  
57  
58  
59  
60

492  
493 Figure 1: Visual representation with point scale ranging from kind/friendly to  
494 angry/irritated

495  
496 Figure 2: Visual representation of body location  
497

498  
499

For peer review only

## Summary

### *Study Focus:*

- ✓ Only a few studies have been performed on how noise affects preschool children.
- ✓ A prerequisite to do so is a method to measure perception, emotional and bodily reaction and coping with noise in the preschool situation.
- ✓ This study explored the reliability and validity of such an instrument based on data derived from a before after intervention study which was carried out at seven preschools in Sweden.

### *Key Messages:*

- ✓ The results show that preschool children can indeed make a clear distinction between perception of and reaction to different types of noise and bodily reactions.
- ✓ Visual representation of emotional reactions and the location of bodily reactions is a good and reliable way to measure reactions in young children.
- ✓ More work on larger samples will need to be done to further develop a standard instrument to be used in preschool aged children.

### *Strength and weaknesses*

- ✓ The strength of this study lies in the fact that the questions posed to the children were based on focus group discussion and worded in their own “language”.
- ✓ A major limitation is the relatively small sample size.

## 26 INTRODUCTION

### 28 Background

29 Earlier studies show that the sound environment at preschools may be a  
30 serious occupational and public health problem. Voss <sup>1</sup> measured eight hour  
31 equivalent noise exposure levels of 80 dB  $L_{Aeq}$  in daycare centers in Denmark.  
32 Maxwell and Evans <sup>2</sup> report four hour  $L_{Aeq}$  levels of 76 dB and peak levels of 96 dBC  
33 in preschools in the USA. [The World Health Organization \(WHO\) recommends a A-  
34 weighted equivalent noise level of 35 dB \( \$L\_{Aeq}\$ \) at preschools in order not to disturb  
35 communication.](#)<sup>3</sup> Dominant noise sources in preschools are sounds from children's  
36 activities indoors. In contrast to elementary schools, the sound environment in  
37 preschools is highly intermittent, uncontrollable and characterized by peak levels of  
38 high spectrum frequency, originating from voices and children's activities. [In order to  
39 describe the sound environment the equivalent noise level  \$L\_{Aeq}\$  is used to represent an  
40 average sound pressure level over a given time, while the highest sound pressure  
41 levels of the intermittent sounds are better described by their maximum noise levels  
42 \( \$L\_{AF,max}\$ \) or peak levels \( \$L\_{Cpeak}\$ \).](#)

43 Acoustical improvements in preschools and schools are most often made by  
44 fitting walls and ceiling with sound absorption panels. The calculated direct effects  
45 are a reduction of the reverberation time -the time it takes for a sound to decay 60 dB  
46 from its original intensity- and moderate reduction of sound level.<sup>4,5</sup>

47 Noisy preschool environments could lead to reduced understanding of speech  
48 and as a consequence impaired reading and writing abilities.<sup>2</sup> Exposures at a young  
49 age might also affect other aspects of later life functioning and the development of  
50 disease. Effects described in the literature indicating such a mechanism pertain to

1  
2  
3 51 hearing impairment<sup>3,6</sup> and increased levels of cortisol in children attending day care  
4  
5 52 centers.<sup>7,8,9</sup> In preschool children also an association was found between noise  
6  
7 53 levels at school and observed hoarseness, breathy voice and vocal hyperfunction.<sup>10</sup>  
8  
9  
10 54 Studies in older children have confirmed effects on reading comprehension and  
11  
12 55 memory<sup>11</sup>, performance<sup>12</sup>, coping, wellbeing and stress<sup>13,14</sup>, and behavior and  
13  
14 56 mental health.<sup>15</sup>

15  
16 57 Reactions to and coping with environmental noise have been studied  
17  
18 58 extensively in the past 30-40 years for adults.<sup>16</sup> Several recent studies also addressed  
19  
20 59 annoyance and coping in school children,<sup>12,13,17,18,19,20,21</sup> while only a handful of  
21  
22 60 studies addressed this issue in younger (preschool) children.<sup>2,22,23,24</sup> In comparison  
23  
24 61 with adults, children in general and preschool children in specific may be particularly  
25  
26 62 susceptible to the effects of noise because they have less capacity to anticipate,  
27  
28 63 understand and cope with stressors<sup>20</sup> and because they are in a crucial and sensitive  
29  
30 64 phase of their development.<sup>3,11</sup>

31  
32  
33 65 Instruments to investigate young children's reactions to noise are not  
34  
35 66 available. In order to fill this gap and in preparation of the development of such an  
36  
37 67 instrument a qualitative study was performed in 2006 among 36 preschool children in  
38  
39 68 Mölndal (Sweden), aged 4-6 years<sup>25</sup> using the constructivist-grounded theory as  
40  
41 69 qualitative approach.<sup>26</sup> The children were asked about their perception of sound in  
42  
43 70 the preschool situation, their understanding of the source and their perceived reactions  
44  
45 71 at emotional and bodily level. Also, the degree of familiarity and comprehensibility of  
46  
47 72 the sounds, manageability/control as well as disturbance and distress by the sounds  
48  
49 73 were addressed. Finally, several coping strategies came forward, subdivided in  
50  
51 74 avoidance (getting away, covering ears etc) and problem- oriented coping (complain  
52  
53 75 to teacher). The method employed was in broad lines comparable to that used by  
54  
55  
56  
57  
58  
59  
60



1  
2  
3 76 Haines et al.<sup>12</sup> in children aged 10-13. She concluded that noise annoyance in children  
4  
5 77 pertains to the same construct as in adults, and this was later confirmed by others.<sup>13,</sup>  
6  
7 78 <sup>16, 17, 18</sup> It is uncertain whether younger children are also able to make such distinctions  
8  
9  
10 79 and thus show a comparable pattern to older children and adults, nor whether they are  
11  
12 80 capable to answer questions during a structured interview regarding their sound  
13  
14 81 environment and the way they emotionally and physically are affected by it in a  
15  
16 82 consistent way.  
17  
18  
19  
20

## 21 **Objectives**

22  
23 85 This paper aims to describe and explore the reliability and validity of the key  
24  
25 86 questions of a structured interview developed for preschool children. The questions  
26  
27  
28 87 pertain to preschool children's perception of noise when at school, their bodily and  
29  
30 88 emotional reaction to it, non-specific (stress related) symptoms and their coping  
31  
32 89 strategies used to diminish detrimental effects of the noise. Aspects related to  
33  
34 90 perceived control and behavioral reactions were left out of the interview, since it was  
35  
36 91 felt that observational methods to measure these aspects would be more suitable to  
37  
38 92 apply in this age group. Bodily reactions to noise in general as well as noise specific  
39  
40 93 reactions were used to examine the external validity of the children's responses.  
41  
42  
43  
44

## 45 **MATERIALS AND METHODS**

### 46 **Selection and recruitment**

47  
48  
49 97 In the period between October 2006 to October 2009 children aged 4-5 and their  
50  
51 98 parents were recruited from seven preschools where interventions were undertaken  
52  
53 99 with the purpose to improve the acoustical qualities in the preschools in Mölndal,  
54  
55  
56 100 Sweden. In total, 63 children and 59 parents filled out the questionnaire before and  
57  
58  
59  
60

1  
2  
3 101 after the intervention. The response rates ranged from 80% in the parents to 98% in  
4  
5 102 the children. Of the children two fell outside the age range of 4-5 years and were  
6  
7 103 excluded from further analysis, resulting in a study population of 61 children. Parents  
8  
9 104 signed an informed consent for their children according to the Declaration of Helsinki.  
10  
11 105 The study was approved by the Ethics Committee of Göteborg, Sweden.  
12  
13  
14 106

### 107 **Procedure**

108 One month before and three months after the intervention the children were  
109 interviewed. In order to diminish the risk of inter-rater variance the interviews were  
110 performed by two trained persons. The interview took on average 20 minutes and the  
111 form was filled in directly by the interviewer. The children were asked questions in a  
112 structured way and presented with visual representations of scales on show cards. The  
113 answers were filled in by the interviewer directly. When the child was not able to  
114 answer the question they were not prompted to do so. For the core set of questions see  
115 Appendix 1. For information about the full protocol please contact the first author.  
116

### 117 **Study population**

118 Table 1 shows the distribution of age and gender of the children included in the  
119 analysis. The 61/59 children respectively included in the before – after study are  
120 reasonably well distributed over gender and age groups. All children aged 4 to 6 years  
121 were asked to participate in the interview, the number of children that took part in the  
122 interview per preschool ranged from 4 to 15.  
123

124 [Table 1: General characteristics of the children \(Before and After intervention\).](#)

| <u>Characteristic</u>            | <u>Before</u> | <u>After</u> |
|----------------------------------|---------------|--------------|
| <u>Number of Respondents (n)</u> | <u>61</u>     | <u>59</u>    |
| <u>Gender</u>                    |               |              |
| <u>girls</u>                     | <u>48%</u>    | <u>49%</u>   |
| <u>boys</u>                      | <u>52%</u>    | <u>51%</u>   |
| <u>Age</u>                       |               |              |
| <u>4 years</u>                   | <u>52%</u>    | <u>32%</u>   |
| <u>5 years</u>                   | <u>48%</u>    | <u>49%</u>   |
| <u>6 years</u>                   | <u>=</u>      | <u>8%</u>    |

125

126

127 **Noise exposure assessment and interventions**

128

129 [Noise was measured one month before and three months after the intervention using](#)  
130 [stationary noise level meter \(Bruel and Kjaer 2261\) with the microphone hanging 0.5](#)  
131 [meters from the ceiling and personal dosimeters \(Larson and Davies Sparks 705+\)](#)  
132 [mounted on the left shoulder of personnel and children in seven preschools. The](#)  
133 [methods are described in more details elsewhere.<sup>27,28</sup> Stationary measurements during](#)  
134 [activity in the various rooms showed a moderate reduction of equivalent A-weighted](#)  
135 [level. The average reduction after the intervention as compared to before varied](#)  
136 [between 1.2 to 3.8 dB \( \$L\_{Aeq}\$ \) depending on the room. Children's dosimeters showed](#)  
137 [that personal average exposures were high and in the range of 83-85 dB \( \$L\_{Aeq}\$ \) and](#)  
138 [117-118 dB \( \$L\_{AFmax}\$ \) both before and after the intervention, hence the intervention did](#)  
139 [not affect personal levels in a measurable way.](#)

140

141

142 **Noise perception**

143

144

145

146

147

1  
2  
3 143 Noise perception was measured by means of standard questions. Children were asked  
4  
5 144 how frequently they heard noise from three relevant noise sources in the preschool  
6  
7 145 situation: angry and yelling children, strong and loud sounds and scraping and  
8  
9 146 screeching sounds. Answers were indicated on a five -point Likert scale (ranging  
10  
11 147 from 'almost never to very often') presented as 5 circles increasing in size and  
12  
13 148 including 1 to 5 dots.  
14  
15

16  
17  
18  
19 150

### Reaction to noise

20  
21 151 Aspects of reaction were measured using the following wording: '*How do you*  
22  
23 152 *feel when\* you hear the [sounds of angry, yelling children][loud and strong sounds]*  
24  
25 153 *[scraping and screeching sounds]*. Answers were indicated on a bipolar visual scale  
26  
27 154 representing drawn figures with different facial and bodily expressions ranging from  
28  
29 155 glad/safe to sad/afraid and from kind/friendly to angry/irritated respectively. The  
30  
31 156 reaction was recoded to neutral position (code 3) for those children who indicated on  
32  
33 157 the previous question on perception, that they did not hear the sound.  
34  
35

36 158 Figure 1 Here  
37  
38  
39 159

### Coping strategies

40  
41 160  
42  
43 161 For noise experienced at preschool, coping strategies were investigated by asking the  
44  
45 162 children what they did when there was a lot of noise and if they coped, how often that  
46  
47 163 was. The phrasing was as follows: '*When there is a lot of noise what do you do*' [*go*  
48  
49 164 *away*], [*put your hands over your ears*][*tell your teacher*] [*raise your voice*]*and if so*  
50  
51 165 *how often [almost never to all the time]*. First the answers No or Yes could be given.  
52  
53 166 If the answer was Yes, they were asked to indicate how often on a five -point Likert  
54  
55  
56  
57  
58  
59  
60

1  
2  
3 167 scale (ranging from 'almost never to very often') presented as 5 circles increasing in  
4  
5 168 size and including 1 to 5 dots.  
6  
7  
8 169  
9  
10 170  
11  
12 171

### 14 172 **Bodily reactions to noise and symptoms**

16 173 In order to measure bodily reactions to the three different sounds, the children were  
17  
18 174 asked to indicate per sound source whether they could feel the sounds in their body  
19  
20  
21 175 and if so where they felt it (Figure 2) (*'when you hear [angry and yelling sounds],*  
22  
23 176 *[strong and loud sounds],[ scraping and screeching sounds] can you feel it inside you*  
24  
25 177 *or in your body and if so please point out in the figure where you feel it'*). The  
26  
27 178 answers were recoded into location *[head] [neck] [arms] [heart] [belly] [legs] [feet]*  
28  
29 179 as well as in number of locations (none versus 1 or more).  
30  
31  
32 180  
33

34 181 Figure 2 Here  
35  
36 182  
37  
38 183

39  
40  
41 184 Nonspecific symptoms were inventoried by asking the children what  
42  
43 185 symptoms they had experienced in the past few days at preschool: headache, tummy  
44  
45 186 ache and hoarse voice. Finally a question was asked about general wellbeing, making  
46  
47 187 use of a similar figures used for reaction to noise [*'in the last days at preschool' have*  
48  
49 188 *you felt like any of these children in this picture*] which was recoded into a 1 to 5  
50  
51  
52 189  
53  
54 190  
55  
56  
57  
58  
59  
60

### 190 **Data analysis**

1  
2  
3 191 In order to test the convergent and divergent validity of the different indices, as a first  
4  
5 192 step, confirmative factor analysis (CFA) was carried out using SAS for Windows  
6  
7 193 (version 9.3) on the reaction and coping questions and perceived health questions.  
8  
9 194 Bodily sensation and health symptoms were included, in order to determine whether  
10  
11 195 children could distinguish between emotional and bodily responses and nonspecific  
12  
13 196 symptoms/ health complaints. Also the items on the questions regarding coping  
14  
15 197 strategies were included in the analysis. A high correlation was expected between  
16  
17 198 reactions (both bodily and emotional) to different noise sources, between symptoms  
18  
19 199 and the different coping strategies. CFA is a special form of factor analysis which is  
20  
21 200 used to test whether measures of a construct are consistent with a researcher's  
22  
23 201 understanding of the nature of that construct (or factor) and therefore suitable for our  
24  
25 202 purpose. The degree of consistency is expressed by several statistical quantities  
26  
27 203 determining the adequacy of model fit to the data, including the standardized root  
28  
29 204 mean square residual (SRMSR) and the adjusted goodness of fit (AGFI). Acceptable  
30  
31 205 model fit is indicated by a SRMSR value of 0.08 or less<sup>29</sup> and an AGFI value of 0.95  
32  
33 206 or more.<sup>30</sup> The contribution of each item to a factor is expressed in factor loadings.  
34  
35 207 Due to small sample size and departure from normality, diagonally weighted least  
36  
37 208 squares were used to estimate the parameters of the factor model.  
38  
39 209 In order to test the internal consistency of the components, Cronbach's alphas were  
40  
41 210 calculated on the grouped items. Indices were composed by simply summing the  
42  
43 211 separate items. These indices were further tested on their concurrent validity by  
44  
45 212 comparing groups with one or more symptoms due to the different noise sources to a  
46  
47 213 group who reported no symptoms. This was performed for the before condition only  
48  
49 214 by means of a t-test assuming unequal variances. Additional analyses were performed  
50  
51 215 on some relevant single items, which were excluded from CFA using nonparametric  
52  
53  
54  
55  
56  
57  
58  
59  
60

216 methods such as Spearman and Mann-Whitney. Limiting factor for all analysis is the  
 217 relatively small sample size. Traditional psychometrics advises that there should be at  
 218 least 10 respondents per item, but sample sizes between 50 and 100 subjects are  
 219 usually considered adequate to evaluate the psychometric properties of measures of  
 220 social constructs. <sup>31</sup>

## 222 RESULTS

223 Table 2 shows the prevalence of noise perception, presented per noise source, and  
 224 emotional reaction, total coping strategies and symptoms.

225 Table 2: Prevalence of noise perception, reaction, symptoms and coping

| <u>Characteristic</u>                                  | <u>Before (n=61)</u> | <u>After (n=59)</u> |
|--------------------------------------------------------|----------------------|---------------------|
| <b><u>Perception noise source *</u></b>                |                      |                     |
| <u>Angry and yelling: Source 1</u>                     | <u>67%</u>           | <u>58%</u>          |
| <u>Loud and strong: Source 2</u>                       | <u>57%</u>           | <u>51%</u>          |
| <u>Scraping and Screeching: Source 3</u>               | <u>35%</u>           | <u>18%</u>          |
| <b><u>Location bodily reaction</u></b>                 |                      |                     |
| <u>At least 1 location</u>                             | <u>70%</u>           | <u>80%</u>          |
| <u>Source 1</u>                                        | <u>54%</u>           | <u>49%</u>          |
| <u>Source 2</u>                                        | <u>54%</u>           | <u>56%</u>          |
| <u>Source 3</u>                                        | <u>51%</u>           | <u>49%</u>          |
| <b><u>Angry reaction (score over 11)**</u></b>         | <u>13%</u>           | <u>5%</u>           |
| <b><u>Prevalence of symptoms (score over 11)**</u></b> | <u>7%</u>            | <u>4%</u>           |
| <b><u>Coping (score over 15)* *</u></b>                | <u>13%</u>           | <u>16%</u>          |

226 \* percentage of percentage of children scoring in the highest two categories

227 \*\* percentage of children scoring in the highest two categories per sum-score

229 The percentage of children indicating they never heard the sound was 17% and 19%  
 230 for the angry and yelling sounds, 22% and 22% for loud sounds and 35% and 52 %  
 231 for the scraping and screeching sounds in the before and after condition respectively.

## 233 Reaction and coping in children: construct validity

1  
2  
3 234 Confirmatory factor analyses (CFA) with categorical indicators were carried out to  
4  
5 235 verify the a-priori structure pertaining to perception, emotional reaction, symptoms  
6  
7 236 and coping strategies in the before and after condition. The perception scales [*How*  
8  
9 237 *often do you hear angry and yelling children, strong and loud sounds and scraping*  
10  
11 238 *and screeching sounds*] as well as the sad reaction scales showed to be too unstable to  
12  
13 239 consider for further analysis. Likewise, the items pertaining to noise perception per  
14  
15 240 source and low wellbeing were too unstable or loaded on many factors and were  
16  
17 241 therefore treated as single items in further analysis (see Table 3). A three factor model  
18  
19 242 was fitted to the remaining ten items pertaining to angry reactions, symptoms and  
20  
21 243 coping. The model fit was good with a SRMSR of .08 and an AGFI of .97 in the  
22  
23 244 before condition, but weaker in the after condition with a SRMSR of .12 and an AGFI  
24  
25 245 of .91. For the before condition the loading are in the ranges .58 to .77, .41 to .78 and  
26  
27 246 .51 to .71 for the three factors respectively. It was decided to take the before analysis  
28  
29 247 as a point of departure and to test the reliability of the scales based on the  
30  
31 248 measurements in the before and after condition.  
32  
33  
34  
35  
36  
37  
38  
39  
40  
41  
42  
43  
44  
45  
46  
47  
48  
49  
50  
51  
52  
53  
54  
55  
56  
57  
58  
59  
60



250 Table 3: Factor Loadings, Goodness of Fit, internal consistency and interrelations

|                                              | Components/Before |               |                | Components/After |               |                |      |
|----------------------------------------------|-------------------|---------------|----------------|------------------|---------------|----------------|------|
|                                              | <u>Reaction</u>   | <u>Coping</u> | <u>Symptom</u> | <u>Reaction</u>  | <u>Coping</u> | <u>Symptom</u> |      |
| Source1_angry                                | .63               |               |                | .33              |               |                |      |
| Source2_angry                                | .77               |               |                | .55              |               |                |      |
| Source3_angry                                | .58               |               |                | .73              |               |                |      |
| go away                                      |                   | .78           |                |                  | .32           |                |      |
| cover ears                                   |                   | .52           |                |                  | .46           |                |      |
| tell teacher                                 |                   | .41           |                |                  | .62           |                |      |
| raise voice                                  |                   | .57           |                |                  | .72           |                |      |
| headache                                     |                   |               | .71            |                  |               | .53            |      |
| tummy ache                                   |                   |               | .67            |                  |               | .18            |      |
| hoarse voice                                 |                   |               | .51            |                  |               | .61            |      |
| Cronbach's alpha                             | .63               | .65           | .67            | .56              | .54           | .52            |      |
| SRMSR                                        | .08               |               |                | .12              |               |                |      |
| AGFI                                         | .97               |               |                | .91              |               |                |      |
| <b>BEFORE</b>                                | a                 | b             | c              | d                | e             | f              | g    |
| a. Perception yelling children               | 1                 | .48*          | .19            | .09              | .11           | .23*           | -.12 |
| b. Perception loud and strong sounds         |                   | 1             | .30*           | .24*             | .25*          | .33*           | .00  |
| c. Perception scraping and screeching sounds |                   |               | 1              | .23*             | .37*          | .25*           | .23* |
| d. Angry reaction                            |                   |               |                | 1                | .33*          | .15            | .22* |
| e. Symptoms                                  |                   |               |                |                  | 1             | .34*           | .56* |
| f. Coping strategies                         |                   |               |                |                  |               | 1              | -.10 |
| g. Low wellbeing                             |                   |               |                |                  |               |                | 1    |

251 \* Significant at .05 level/missing values pairwise deletion

252

253

1  
2  
3 254 **Reliability in terms of internal consistency**  
4

5 255 Three groups of variables pertaining to Angry Reaction, Coping and Symptoms were  
6  
7 256 tested on their internal consistency expressed in alpha for the two measurements  
8  
9  
10 257 (Table 3 row 11). The analysis yielded homogeneous scales with comparable alpha's  
11  
12 258 over the measurements ranging from .56 to .75. The relatively low alpha's in the after  
13  
14 259 condition are partly due to test length and imply the risk to underestimate/attenuate  
15  
16 260 the relationships between the variables and other variables.<sup>32</sup> However, based on the  
17  
18 261 findings in the before condition it was considered justified to compose three indices  
19  
20 262 by summing the scores on the separate items within each factor and to test  
21  
22 263 distributions on normality. Deviations of normality were slight and most pronounced  
23  
24 264 in the symptom scales.

25  
26  
27 265 Correlation analyses between these indices and items related to perception of noise  
28  
29 266 and low wellbeing were studied for the before situation only (Table 3) and showed  
30  
31 267 moderate to weak associations between perception and outcomes, but mostly in line  
32  
33 268 with our expectations. Perception of scraping and screeching sounds was most  
34  
35 269 strongly associated with angry reactions, coping, symptoms as well as low wellbeing  
36  
37 270 followed by perceived loud sounds. Coping strategies were associated most strongly  
38  
39 271 with symptoms and the highest association was found between symptoms and low  
40  
41 272 wellbeing. Since items referring to sad reactions to the different sounds did not form  
42  
43 273 one factor and the bipolar items do not allow for correlational analysis, separate  
44  
45 274 analysis was performed after dichotomizing the scores on sad reaction items. Mann-  
46  
47 275 Whitney analysis showed that sadness due to loud noises was associated with  
48  
49 276 symptoms (Z-value=2.3/p=.021) and sad reaction due to scraping/screeching sounds  
50  
51 277 with symptoms (Z-value=3.4/ p=.001) and coping strategies (Z-value=2.7/p=.008),  
52  
53  
54  
55  
56  
57  
58  
59  
60

1  
2  
3 278 while sadness due to yelling sounds was found not to be associated with any of the  
4  
5 279 indices on angry reaction, symptoms or coping.  
6  
7

8 280  
9

10  
11 281 **Concurrent validity**  
12

13 282 As a last step in the psychometric evaluation, the associations between bodily  
14  
15 283 reactions to noise and the three indices and the single item low wellbeing were  
16  
17 284 analyzed to explore the concurrent validity. This refers to the accuracy of the relevant  
18  
19 285 test scores to estimate an individual state on a criterion, in this case bodily reaction  
20  
21 286 (general and noise source specific).  
22  
23

24 287 The rationale behind this analysis is that angry reaction, amount of coping strategies  
25  
26 288 (number and frequency) and symptoms as well as low wellbeing are expected to be  
27  
28 289 associated with bodily reactions. The associations between bodily reactions to noise  
29  
30 290 with these relevant test-scores were studied by means of t-test. Hereby dichotomous  
31  
32 291 groups were formed based on respectively any bodily reaction, and bodily reactions  
33  
34 292 per noise source versus none. Distributions were checked per group and angry  
35  
36 293 reaction was dropped from the analysis because the majority of data points in the  
37  
38 294 group with no bodily reaction contained only children who had indicated they did not  
39  
40 295 hear the sound. Subsequently, the mean scores on the remaining indices and the low  
41  
42 296 wellbeing item were compared between groups. Table 4 presents the results.  
43  
44  
45

46 297  
47  
48  
49  
50  
51  
52  
53  
54  
55  
56  
57  
58  
59  
60

298 Table 4. Bodily reaction and children's coping, symptoms and low wellbeing (before  
299 condition)  
300

|                   | Bodily reaction to any source | Bodily reaction to yelling sounds | Bodily reaction to loud sounds | Bodily reaction to scraping and screeching sounds |
|-------------------|-------------------------------|-----------------------------------|--------------------------------|---------------------------------------------------|
| Symptom           | -4.67**                       | -2.18*                            | -2.34*                         | 2.69*                                             |
| Coping strategies | -2.62*                        | -2.58*                            | -1.53                          | -2.04*                                            |
| Low wellbeing     | -1.97                         | -2.34*                            | -1.05                          | -1.50                                             |

301 Observed t-statistic/p-value < 0.05 marked as \* and p<0.001 marked as \*\*  
302

303  
304 T-test yielded significant differences in means on symptoms before for groups based  
305 on presence of any bodily reactions as well as presence of bodily reaction to the  
306 separate sources. The same pattern was found for coping with the exception of loud  
307 sounds. Low wellbeing when at school in the before condition, measured with a single  
308 item, showed to be associated significantly with bodily reaction to loud sounds only,  
309 while any bodily reaction just failed significance. In the after condition this pattern  
310 was only partly confirmed for symptoms with any bodily reaction and low wellbeing  
311 with any bodily reaction. Since t-test assumes normal distribution, in addition non  
312 parametric tests were applied. Further analysis showed that each hypothesis with p-  
313 value <0.05 for the t-test had Mann-Whitney p-values not exceeding 0.08.  
314

## 315 DISCUSSION

316 The results of the psychometric evaluation indicate that preschool children are able to  
317 make a distinction between reactions to noises and emotional and bodily reactions as  
318 measured by means of visual representations of reactions and representation of the  
319 location of bodily reactions. As in adults<sup>33</sup>, the interrelations between angry reactions  
320 to different sounds and noises were relatively high, while the relation between angry

1  
2  
3 321 reactions and symptom related aspects was lower: in other words reaction and  
4  
5 322 symptoms can be considered as separate dimensions. This is also consistent with the  
6  
7 323 findings among school children (9-11 years) in the RANCH study<sup>18</sup> and a survey  
8  
9 324 among 207 children (aged 13-14 years).<sup>34, 36</sup> Furthermore, the results are in  
10  
11 325 agreement with the results of a RANCH sub-study<sup>35</sup> in which it was found that  
12  
13 326 children were capable to reliably index complex soundscapes and to provide  
14  
15 327 perceptual scales that were in striking agreement with the perceptual scales provided  
16  
17 328 by adults. We also found that angry reactions to noise could be distinguished from  
18  
19 329 coping strategies. Comparing the elements of the correlation matrix in the before  
20  
21 330 condition for perceptions of the different sound sources and its effects we conclude  
22  
23 331 that scraping and screeching sounds play a prominent role, with significant  
24  
25 332 associations for angry reaction, coping and symptoms. Whilst coping was  
26  
27 333 significantly associated with all sounds, angry and loud sounds were not associated  
28  
29 334 with angry reaction or symptoms. Based on the pattern we hypothesize that there is a  
30  
31 335 pathway from perception of scraping and screeching sounds via angry reactions and  
32  
33 336 coping to symptoms and via symptoms to low wellbeing.

34  
35  
36  
37  
38 337 An important finding is that children compared to adults seem to have a  
39  
40 338 tendency to describe reaction to noise in a somatic way: they literally feel the noise in  
41  
42 339 their body, especially in the head, heart and tummy.

43  
44  
45 340 Both the (angry) reaction and symptoms indices are significantly associated  
46  
47 341 with general low wellbeing while at school and these responses tend to be sound  
48  
49 342 specific. While loud and yelling sounds are only associated with coping, the  
50  
51 343 perception of scraping and screeching sounds is significantly associated with angry  
52  
53 344 reactions, coping as well as symptoms. [This finding is important in view of future](#)  
54  
55 345 [interventions at preschools as scraping and screeching sounds mainly originate from](#)  
56  
57  
58  
59  
60

1  
2  
3 346 [friction between surfaces, such as chairs being pulled across the floor or table wares](#)  
4  
5 347 [moved on the table top. To our knowledge no standards exist that give guidance on](#)  
6  
7 348 [how to predict these sounds, which makes them problematic to systematically address.](#)  
8  
9

10 349 The four coping items included in the questionnaire pertain to active and avoidant  
11  
12 350 behavior, a distinction which is confirmed in studies among older children and adults,  
13  
14 351 but also came forward from the focus group discussions with children.<sup>24</sup> Results of  
15  
16 352 CFA analysis showed a high inter correlation between the different coping strategies,  
17  
18 353 with a slight tendency for a two sub-factors structure, pertaining to problem oriented  
19  
20 354 coping and avoidance. This has implications for the interpretation of the coping index:  
21  
22 355 it refers to the number and frequency of strategies employed rather than more or less  
23  
24 356 effective strategies to cope with environmental noise. Future work should attempt to  
25  
26 357 expand the number of items related to these different strategies which young children  
27  
28 358 employ to cope with classroom noise.  
29  
30

31  
32 359 Explorative comparison of children's symptom report and bodily reactions  
33  
34 360 reveal a reasonable consistent pattern and indicate satisfactory concurrent validity of  
35  
36 361 most of the indices for the before situation.  
37

38  
39 362 The strength of this study lies in the fact that the questions posed to the  
40  
41 363 children were based on focus group discussion and worded in their own "language".  
42  
43 364 A major limitation is the relatively small sample size. Future research on larger  
44  
45 365 groups of preschool children will be needed to further refine the questions in  
46  
47 366 particular the questions pertaining to well-being and coping. Such an instrument will  
48  
49 367 allow for studying development in reaction over time as well as the evaluation of  
50  
51 368 noise reducing measurements in preschool in an unobtrusive and playful manner.  
52  
53

54 369 Previous studies suggest that children have fewer possibilities for controlling  
55  
56 370 noise or have a less developed coping repertoire than adults.<sup>20, 23</sup> Development of  
57  
58  
59  
60

1  
2  
3 371 coping strategies would be an important target for future research in this group: noise  
4  
5 372 induced behaviors at a young age (e.g. learned helplessness) might affect other  
6  
7 373 aspects of later life functioning and the development of disease. Furthermore, this  
8  
9  
10 374 study shows that emotional reaction (angry and sad) is not the only relevant indicator  
11  
12 375 of the effects of community noise in children, also bodily reactions, symptoms,  
13  
14 376 coping behavior and wellbeing show to be important.  
15

377

### 378 **CONCLUSION**

379 The main conclusion to be drawn from this study is that young children's angry  
380 reaction and bodily reactions to and coping with noise can be reliably measured with a  
381 structured interview, including visual representation questions. In accordance with  
382 what was found in adults<sup>33</sup> and children aged 9-11<sup>18,21</sup> we found that also younger  
383 children are able to distinguish between emotional reactions, symptoms, coping and  
384 wellbeing. Compared to adults, younger children tend to describe their reactions to  
385 noise in a somatic way. After further development of the instrument discussed in this  
386 paper we foresee studies into young children's reactions to and coping with noise on a  
387 larger scale.

### 388 **Acknowledgements**

389 We are grateful to Agneta Agge and Lena Samuelsson for their competence in  
390 carrying out the interviews. We also want to thank the participating children and their  
391 parents. The study was funded by the Swedish Council for Working Life and Social  
392 research.

## 393 REFERENCES

- 394 1. Voss P. Noise in children's day care centers. AkustikNet A/S, 2005,23-25  
 395 Denmark. [www.akustiknet.dk](http://www.akustiknet.dk), date accessed 2012-11-26.
- 396 2. Maxwell LE, Evans GW. The effects of noise on preschool children's  
 397 prereading skills. *J Environ Psychol* 2000;**20**:91-97.
- 398 3. Berglund, B., T. Lindvall, et al. (1999). *Guidelines for community noise*,  
 399 World Health Organisation (WHO).
- 400 4. Kawai K. *Effect of sound absorption on indoor sound environment of nursery*  
 401 *school classrooms*. In: Burgess M, ed. Proceedings of 20th International  
 402 Congress on Acoustics, ICA, Sydney, Australia 2010.
- 403 5. Berg F, Blair J, Benson P. Classroom acoustics: The problem, impact, and  
 404 solution. *Lang Speech Hear Serv Schools* 1996;**27**:16-20.
- 405 6. Passchier-Vermeer W. Noise and Health of Children. Report  
 406 PG/VGZ/2000.042. Leiden: *Netherlands Organization for Applied Scientific*  
 407 *Research* (TNO) 2000.
- 408 7. Dettling AC, Parker SW, Lane SK, et al. Quality of care and temperament  
 409 determine whether cortisol levels rise over the day for children in full-day  
 410 child care. *Psychoneuroendocrinology* 2000;**25**:819-836.
- 411 8. Evans GW. The Environment of Childhood Poverty. *Am Psychol* 2004;**59**:77-  
 412 92.
- 413 9. Blair C, Granger D, Peters Razza R. Cortisol Reactivity Is Positively Related  
 414 to Executive Function in Preschool Children Attending Head Start. *Child Dev*  
 415 2005 ;**76**:554–567.
- 416 10. McAllister, Svante Granqvist, Peta Sjölander and Johan Sundberg. Child  
 417 Voice and Noise: A Pilot Study of Noise in Day Cares and the Effects on 10  
 418 Children's Voice Quality According to Perceptual Evaluation, *Journal of*  
 419 *Voice* 2009;(23), 5: 587- 593.
- 420 ~~10~~.11. Stansfeld SA, Berglund B, Clark C, et al. Aircraft and road traffic  
 421 noise and children's cognition and health: a cross-national study. *Lancet*  
 422 2005;**365**: 1942-9.
- 423 ~~11~~.12. Haines MM, Brentnall SL, Stansfeld SA, et al. Qualitative responses of  
 424 children to environmental noise. *Noise & Health* 2003;**5**:19-30.
- 425 ~~12~~.13. Lercher P, Evans G W, Meis M et al. Ambient neighbourhood noise  
 426 and children's mental health *Occup Environ Med* 2002;**59**:380-386.
- 427 ~~13~~.14. May M, Emond A, Crawley E. Phenotypes of chronic fatigue  
 428 syndrome in children and young people. *Arch Dis Child*, 2010;**4**:245-249.
- 429 ~~14~~.15. Stansfeld SA. *The effects of noise on health; new challenges and*  
 430 *opportunities*. In: Institute of Acoustics eds. Proceedings of the 8th European  
 431 Conference on Noise Control, Euronoise, Edinburgh UK, 2009. ISBN:  
 432 9781615676804.
- 433 ~~15~~.16. Clark C, Stansfeld SA. The effect of transportation noise on health and  
 434 cognitive development: a review of recent evidence. *Int J Comp Psychol* 2007;  
 435 **20**:145-158.
- 436 ~~16~~.17. Babisch W, Schulz C, Seiwert M. et al. Noise annoyance as reported  
 437 by 8-14 year old children. *Environ Behav* 2012;**44**:68-86.
- 438 ~~17~~.18. Van Kempen EMM, Kamp I van, Stellato R. et al. Children's  
 439 annoyance reactions to aircraft noise and road traffic noise: the RANCH-  
 440 project. *J Acoust Soc Am*, 2009;**125**:895-904.



- 1  
2  
3 441 | ~~18-19.~~ Lercher P, Evans GW, Meis M. Ambient Noise and Cognitive  
4 442 | Processes among Primary Schoolchildren. *Environ Behav* 2003;**35**:725-735.  
5 443 | ~~19-20.~~ Bstrup ML. Prevention of adverse effects of noise on children. *Noise*  
6 444 | *& Health* 2003;**5**:59-65.  
7 445 | ~~20-21.~~ Haines MM, Stansfeld SA, Job RFS. et al. Chronic aircraft noise  
8 446 | exposure, stress responses, mental health and cognitive performance in school  
9 447 | children. *Psychol Med* 2001;**31**:265-277.  
10 448 | ~~21-22.~~ Regecová V, Kellerová E. Effects of urban noise pollution on blood  
11 449 | pressure and heart rate in preschool children. *J Hypertens* 1995;**13**:405-12.  
12 450 | ~~22-23.~~ Belojevic G, Jakovljevic B, Vesna S, et al. Urban road-traffic noise and  
13 451 | blood pressure and heart rate in preschool children. *Environ Int* 2008;**34**:226-  
14 452 | 231.  
15 453 | ~~23-24.~~ Maxwell, LE. Preschool and day care environments. In: Lueder R,  
16 454 | Rice V eds. *Child Ergonomics*, New York: Taylor and Francis 2007:653-688.  
17 455 | ~~24-25.~~ Dellve L, Samuelsson L, Persson Waye K. Preschool children's  
18 456 | experience and understanding of their soundscape. *Qual Res Psychol*  
19 457 | 2013;**10**:1-13.  
20 458 | ~~25-26.~~ Charmaz K. *Constructing grounded theory: a practical guide through*  
21 459 | *qualitative analysis*. Thousand Oaks SAGE Publications 2006  
22 460 | ~~26-27.~~ Persson Waye K, Larsson P, Hult M. *Perception and measurement of*  
23 461 | *preschool sound environment before and after acoustic improvements*. In:  
24 462 | Bolton J S ed. 38th International Congress and Exposition on Noise Control  
25 463 | Engineering, INTER-NOISE, Ottawa, Canada 2009.  
26 464 | ~~27-28.~~ Persson Waye K, Agge A, Hillström J et al *Being in a preschool sound*  
27 465 | *environment- annoyance and subjective symptoms among personnel and*  
28 466 | *children. Perception and measurement of preschool sound environment before*  
29 467 | *and after acoustic improvements*. In: 39th International Congress and  
30 468 | Exposition on Noise Control Engineering, INTER-NOISE Lisbon Portugal  
31 469 | 2010.  
32 470 | ~~28-29.~~ Hu L, Bentler PM. Cutoff criteria for fit indexes in covariance structure  
33 471 | analysis: Coventional criteria versus new alternatives. *Struct Equ Modeling*  
34 472 | 1999;**6**:1-55.  
35 473 | ~~29-30.~~ Shevlin M, Miles J. N. V. Effects of sample size, model specification  
36 474 | and factor loadings on the GFI in confirmatory factor analysis. *Pers Individ*  
37 475 | *Dif* 1998;**25**:85-90.  
38 476 | 31. Sapnas, K. G. and R. A. Zeller (2002). "Minimizing sample size when using  
39 477 | exploratory factor analysis for measurement." *Journal of nursing measurement*  
40 478 | 2002;**10**(2): 135-154.  
41 479 | 32. Schmitt, Neal (1996) *Uses and Abuses of Coefficient Alpha Psychological*  
42 480 | *Assessment* 1996 **8** (4): 350-353  
43 481 | ~~30-33.~~ Van Kamp I. *Indicators of annoyance: a psychometric approach; the*  
44 482 | *measurement of annoyance and interrelations between different measures*. In:  
45 483 | Boone R, ed. International Congress and Exposition on Noise Control  
46 484 | Engineering, INTER-NOISE Den Haag, the Netherlands, 2001.  
47 485 | ~~31-34.~~ Boman E, Enmarker I. Factors affecting pupils' noise annoyance in  
48 486 | schools: the building and testing of models. *Environ Behav* 2004;**36**:207-28.  
49 487 | ~~32-35.~~ Gunnarsson AG, Berglund B, Haines M, et al. *Psychological*  
50 488 | *restoration in noise*. In: Jong RG, de, Houtgast T, Franssen EAM et al eds.  
51 489 | proceedings of the 8th International Congress on Noise as a Public Health  
52 490 | Problem. Rotterdam, the Netherlands, 2003:159-60.

1  
2  
3 491 | ~~33~~.36. Enmarker I, Boman E. Noise annoyance responses of middle school  
4 492 pupils and teachers. *J Environ Psychol* 2004;**24**:527-36.  
5 493  
6  
7  
8  
9  
10  
11  
12  
13  
14  
15  
16  
17  
18  
19  
20  
21  
22  
23  
24  
25  
26  
27  
28  
29  
30  
31  
32  
33  
34  
35  
36  
37  
38  
39  
40  
41  
42  
43  
44  
45  
46  
47  
48  
49  
50  
51  
52  
53  
54  
55  
56  
57  
58  
59  
60

1  
2  
3  
4  
5  
6  
7  
8  
9  
10  
11  
12  
13  
14  
15  
16  
17  
18  
19  
20  
21  
22  
23  
24  
25  
26  
27  
28  
29  
30  
31  
32  
33  
34  
35  
36  
37  
38  
39  
40  
41  
42  
43  
44  
45  
46  
47  
48  
49  
50  
51  
52  
53  
54  
55  
56  
57  
58  
59  
60

494  
495 Figure 1: Visual representation with point scale ranging from kind/friendly to  
496 angry/irritated

497  
498 Figure 2: Visual representation of body location  
499  
500  
501

For peer review only

1  
2  
3  
4  
5  
6  
7  
8  
9  
10  
11  
12  
13  
14  
15  
16  
17  
18  
19  
20  
21  
22  
23  
24  
25  
26  
27  
28  
29  
30  
31  
32  
33  
34  
35  
36  
37  
38  
39  
40  
41  
42  
43  
44  
45  
46  
47  
48  
49  
50  
51  
52  
53  
54  
55  
56  
57  
58  
59  
60

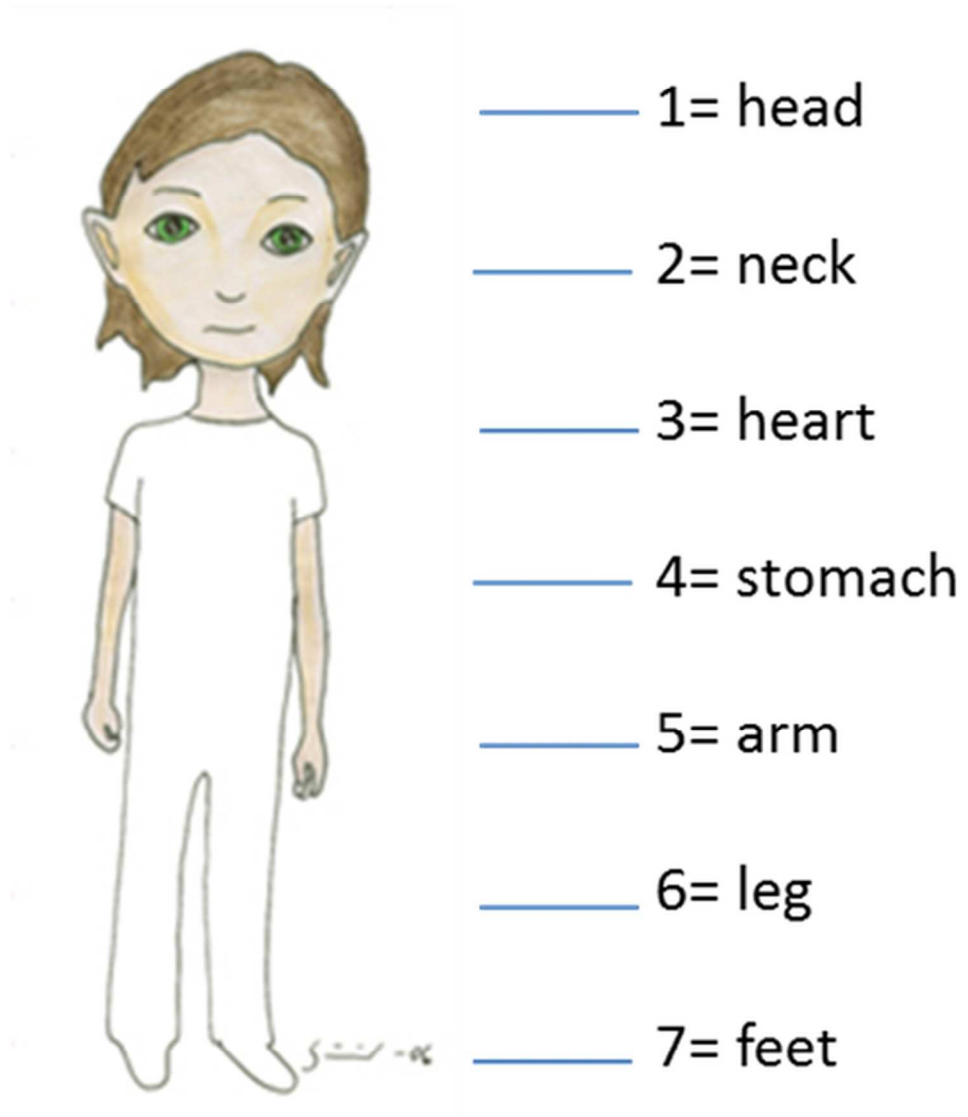

90x105mm (300 x 300 DPI)

1  
2  
3  
4  
5  
6  
7  
8  
9  
10  
11  
12  
13  
14  
15  
16  
17  
18  
19  
20  
21  
22  
23  
24  
25  
26  
27  
28  
29  
30  
31  
32  
33  
34  
35  
36  
37  
38  
39  
40  
41  
42  
43  
44  
45  
46  
47  
48  
49  
50  
51  
52  
53  
54  
55  
56  
57  
58  
59  
60

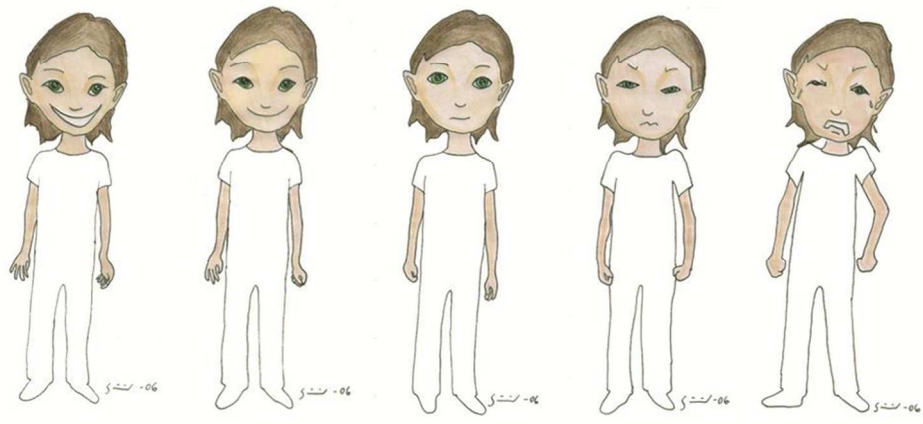

183x90mm (300 x 300 DPI)

er review only

1  
2  
3  
4  
5  
6  
7  
8  
9  
10  
11  
12  
13  
14  
15  
16  
17  
18  
19  
20  
21  
22  
23  
24  
25  
26  
27  
28  
29  
30  
31  
32  
33  
34  
35  
36  
37  
38  
39  
40  
41  
42  
43  
44  
45  
46  
47  
48  
49  
50  
51  
52  
53  
54  
55  
56  
57  
58  
59  
60

Inventory of Noise and  
Children's Health  
**INCH**

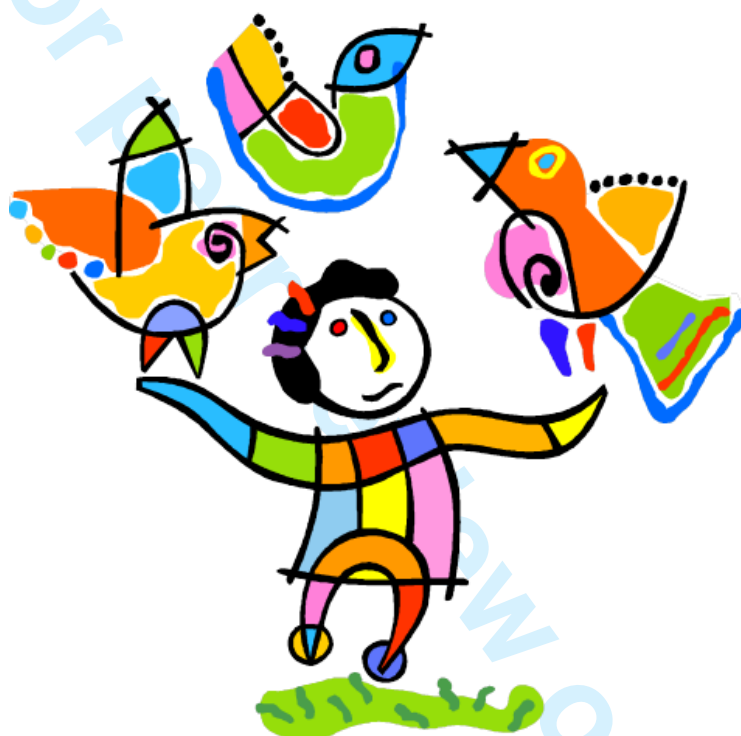

- 1  
2  
3  
4  
5  
6  
7  
8  
9  
10  
11  
12  
13  
14  
15  
16  
17  
18  
19  
20  
21  
22  
23  
24  
25  
26  
27  
28  
29  
30  
31  
32  
33  
34  
35  
36  
37  
38  
39  
40  
41  
42  
43  
44  
45  
46  
47  
48  
49  
50  
51  
52  
53  
54  
55  
56  
57  
58  
59  
60
10. How often do you hear other children at preschool being angry and yelling?
12. How often do you hear loud and strong sounds at preschool - like shouting, screaming or banging?
14. How often do you hear scraping and screeching sounds?

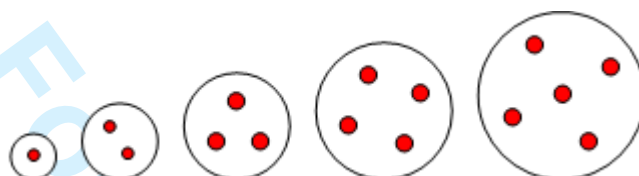

Almost never

Very often

Repeat for 10, 12, 14

- 11a. When you hear other children being angry and yelling, do you feel it inside you or in your body?
- 13a. When you hear loud, strong sounds, do you feel it inside you or in your body?
- 15a. When you hear scraping and screeching sounds, do you feel it inside you or in your body?
- If No, go to Question 16.  If Yes, point out in the picture where you feel it.

Repeat for 11a, 13a, 15a

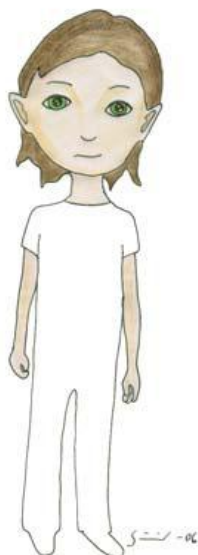

1  
2  
3  
4  
5  
6  
7  
8  
9  
10  
11  
12  
13  
14  
15  
16  
17  
18  
19  
20  
21  
22  
23  
24  
25  
26  
27  
28  
29  
30  
31  
32  
33  
34  
35  
36  
37  
38  
39  
40  
41  
42  
43  
44  
45  
46  
47  
48  
49  
50  
51  
52  
53  
54  
55  
56  
57  
58  
59  
60

11c. Sometimes when you hear children being angry and yelling, you might feel like one of the children in this picture.

13c. Sometimes when you hear loud, strong sounds, you might feel like one of the children in this picture.

15c. Sometimes when you hear scraping and screeching sounds, you might feel like one of the children in this picture.

Point to the child that looks most like how you feel when you hear these sounds.

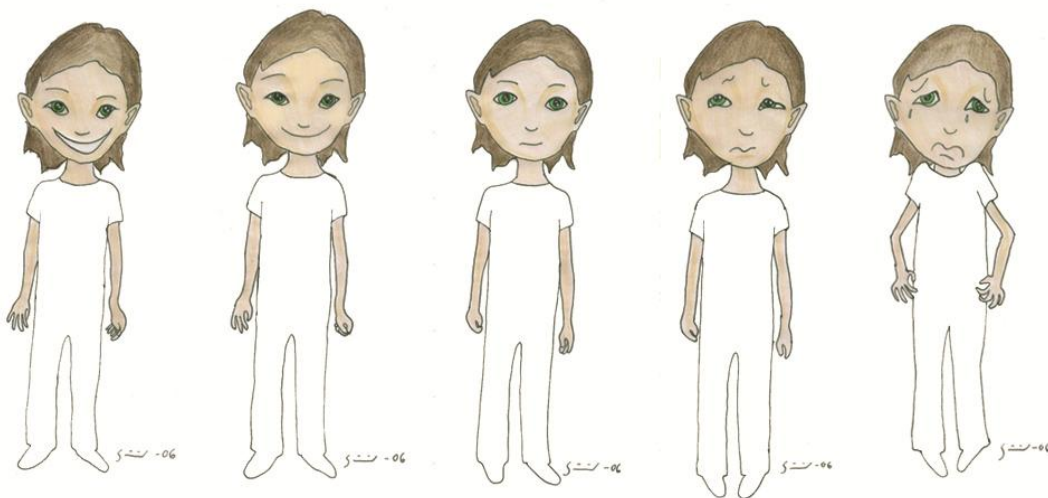

glad/safe

sad/afraid



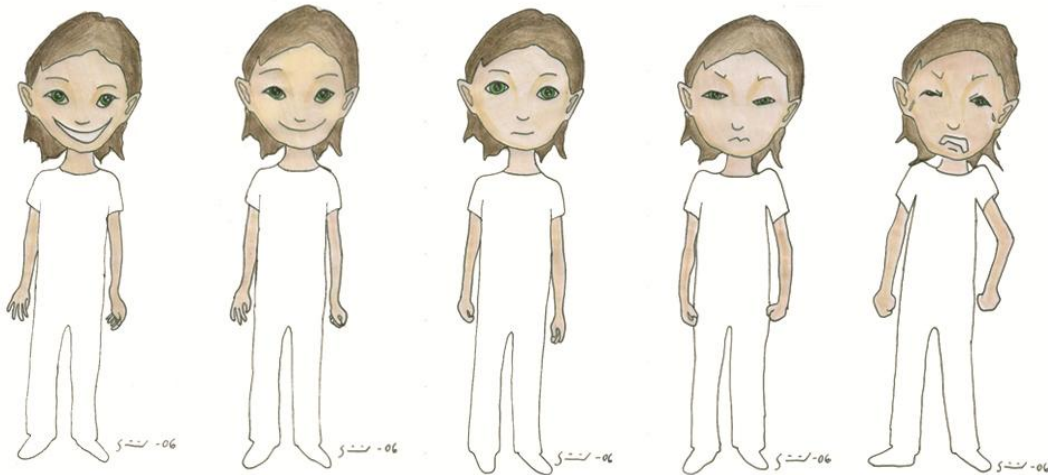

kind/friendly

angry/irritated

Repeat for 11c, 13c, 15c

16. When there's a lot of noise, what do you do?

- a) Do you go away?
- b) Put your hands over your ears?
- c) Tell the teacher?
- d) Do you need to raise your voice in order to be heard?

- No, go to next question
- if Yes How often do you do that?

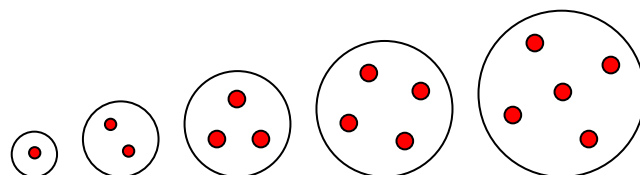

Almost never

Always

Repeat for 16a, 16b, 16c and 16 d

1  
2  
3  
4  
5  
6 18. The questions I am going to ask now are about how you have been feeling  
7 at preschool in the past few days.

- 8  
9  
10 a) Have you had a headache?  
11  
12 b) Have you had a tummy ache?  
13  
14  
15 c) Have your voice been hoarse?  
16



28 Repeat for 18a, 18b, 18c

29  
30  
31  
32  
33  
34  
35 19. In the past few days, have you felt like any of the children in this  
36 picture? Can you point at the one you felt like?  
37  
38





UNIVERSITY OF  
GOTHENBURG

Procedure for use of the Questionnaire: **INCH**

These questions are part of a questionnaire which was developed within the Sound Environment Research Unit at Gothenburg University under the leadership of Kerstin Persson Waye [www.amm.se/soundenvironment](http://www.amm.se/soundenvironment)

The full questionnaire can be obtained by contacting the first author.

The questionnaire can be used under the following conditions:

- The source should be mentioned e.g. this article.
- Manuscripts and articles dealing with results obtained with the questionnaire should be sent to [kerstin.persson.waye@amm.gu.se](mailto:kerstin.persson.waye@amm.gu.se)
- Part of the research data should be made available to the author of the questionnaire (in consultation with the author) for further validation.

## STARD checklist for the reporting of studies of diagnostic accuracy

| Section and Topic          | Item # |                                                                                                                                                                                                                                                           | On page #             |
|----------------------------|--------|-----------------------------------------------------------------------------------------------------------------------------------------------------------------------------------------------------------------------------------------------------------|-----------------------|
| TITLE/ABSTRACT/KEYWORDS    | 1      | Identify the article as a study of diagnostic accuracy (recommended MeSH heading 'sensitivity and specificity')                                                                                                                                           | I-II                  |
| INTRODUCTION               | 2      | State the research questions or study aims, such as estimating diagnostic accuracy or comparing accuracy between tests or across participant groups                                                                                                       | 1-2                   |
| <b>METHODS</b>             |        |                                                                                                                                                                                                                                                           |                       |
| <i>Participants</i>        | 3      | Describe the study population: The inclusion and exclusion criteria, setting and locations where the data were collected                                                                                                                                  | 4-5                   |
|                            | 4      | Describe participant recruitment: Was recruitment based on presenting symptoms, results from previous tests, or the fact that the participants had received the index tests or the reference standard?                                                    | 4-5                   |
|                            | 5      | Describe participant sampling: Was the study population a consecutive series of participants defined by the selection criteria in items 3 and 4? If not, specify how participants were further selected                                                   | As defined in 3 and 4 |
|                            | 6      | Describe data collection: Was data collection planned before the index test and reference standard were performed (prospective study) or after (retrospective study)?                                                                                     | Before-after study    |
| <i>Test methods</i>        | 7      | Describe the reference standard and its rationale                                                                                                                                                                                                         | na                    |
|                            | 8      | Describe technical specifications of material and methods involved including how and when measurements were taken, and/or cite references for index tests and reference standard                                                                          | 5                     |
|                            | 9      | Describe definition of and rationale for the units, cutoffs and/or categories of the results of the index tests and the reference standard                                                                                                                | 6-9                   |
|                            | 10     | Describe the number, training and expertise of the persons executing and reading the index tests and the reference standard                                                                                                                               | 5                     |
|                            | 11     | Describe whether or not the readers of the index tests and reference standard were blind (masked) to the results of the other test and describe any other clinical information available to the readers                                                   | na                    |
| <i>Statistical methods</i> | 12     | Describe methods for calculating or comparing measures of diagnostic accuracy, and the statistical methods used to quantify uncertainty (e.g. 95% confidence intervals)                                                                                   | 9                     |
|                            | 13     | Describe methods for calculating test reproducibility, if done                                                                                                                                                                                            | 9                     |
| <b>RESULTS</b>             |        |                                                                                                                                                                                                                                                           |                       |
| <i>Participants</i>        | 14     | Report when study was done, including beginning and ending dates of recruitment                                                                                                                                                                           | 4                     |
|                            | 15     | Report clinical and demographic characteristics of the study population (e.g. age, sex, spectrum of presenting symptoms, comorbidity, current treatments, recruitment centers)                                                                            | 10                    |
|                            | 16     | Report the number of participants satisfying the criteria for inclusion that did or did not undergo the index tests and/or the reference standard; describe why participants failed to receive either test (a flow diagram is strongly recommended)       | 10                    |
| <i>Test results</i>        | 17     | Report time interval from the index tests to the reference standard, and any treatment administered between                                                                                                                                               | 5                     |
|                            | 18     | Report distribution of severity of disease (define criteria) in those with the target condition; other diagnoses in participants without the target condition                                                                                             | na                    |
|                            | 19     | Report a cross tabulation of the results of the index tests (including indeterminate and missing results) by the results of the reference standard; for continuous results, the distribution of the test results by the results of the reference standard | na                    |
|                            | 20     | Report any adverse events from performing the index tests or the reference standard                                                                                                                                                                       | na                    |
| <i>Estimates</i>           | 21     | Report estimates of diagnostic accuracy and measures of statistical uncertainty (e.g. 95% confidence intervals)                                                                                                                                           | 12-15                 |
|                            | 22     | Report how indeterminate results, missing responses and outliers of the index tests were handled.                                                                                                                                                         | 7, 9                  |
|                            | 23     | Report estimates of variability of diagnostic accuracy between subgroups of participants, readers or centers, if done.                                                                                                                                    | na                    |
|                            | 24     | Report estimates of test reproducibility, if done                                                                                                                                                                                                         | 12-13                 |
| DISCUSSION                 | 25     | Discuss the clinical applicability of the study findings                                                                                                                                                                                                  | 15-18                 |

This checklist is found at: [www.consort-statement.org/checklist\\_test.pdf](http://www.consort-statement.org/checklist_test.pdf)
